# The effects of soil phosphorous content on microbiota are driven by the plant phosphate starvation response

Short title: **The plant microbiome under phosphate starvation**

**Omri M. Finkel\***

Department of Biology, University of North Carolina at Chapel Hill, Chapel Hill, North Carolina, United States of America, Howard Hughes Medical Institute, University of North Carolina at Chapel Hill, Chapel Hill, North Carolina, United States of America

**Isai Salas-González\***

Department of Biology, University of North Carolina at Chapel Hill, Chapel Hill, North Carolina, United States of America, Howard Hughes Medical Institute, University of North Carolina at Chapel Hill, Chapel Hill, North Carolina, United States of America, Curriculum in Bioinformatics and Computational Biology, University of North Carolina at Chapel Hill, Chapel Hill, North Carolina, United States of America

**Gabriel Castrillo\***

Department of Biology, University of North Carolina at Chapel Hill, Chapel Hill, North Carolina, United States of America, Howard Hughes Medical Institute, University of North Carolina at Chapel Hill, Chapel Hill, North Carolina, United States of America

Current address: Future Food Beacon of Excellence and the School of Biosciences, University of Nottingham, Sutton Bonington, United Kingdom

**Stijn Spaepen**

Department Plant Microbe Interactions, Max Planck Institute for Plant Breeding Research, Köln, Germany

Current address: Center of Microbial and Plant Genetics, Katholieke Universiteit Leuven, Leuven, Belgium

**Theresa F. Law**

Department of Biology, University of North Carolina at Chapel Hill, Chapel Hill, North Carolina, United States of America, Howard Hughes Medical Institute, University of North Carolina at Chapel Hill, Chapel Hill, North Carolina, United States of America

**Corbin D. Jones**

Department of Biology, University of North Carolina at Chapel Hill, Chapel Hill, North Carolina, United States of America, Curriculum in Bioinformatics and Computational Biology, University of North Carolina at Chapel Hill, Chapel Hill, North Carolina, United States of America, Department of Genetics, University of North Carolina at Chapel Hill, Chapel Hill, North Carolina, United States of America, Lineberger Comprehensive Cancer Center, University of North Carolina at Chapel Hill, Chapel Hill, North Carolina, United States of America, Carolina Center for Genome Sciences, University of North Carolina at Chapel Hill, Chapel Hill, North Carolina, United States of America, Curriculum in Genetics and Molecular Biology, University of North Carolina at Chapel Hill, Chapel Hill, North Carolina, United States of America

**Jeffery L. Dangl‡**

Department of Biology, University of North Carolina at Chapel Hill, Chapel Hill, North Carolina, United States of America, Howard Hughes Medical Institute, University of North Carolina at Chapel Hill, Chapel Hill, North Carolina, United States of America, Curriculum in Bioinformatics and Computational Biology, University of North Carolina at Chapel Hill, Chapel Hill, North Carolina, United States of America, Carolina Center for Genome Sciences, University of North Carolina at Chapel Hill, Chapel Hill, North Carolina, United States of America, Curriculum in Genetics and Molecular Biology, University of North Carolina at Chapel Hill, Chapel Hill, North Carolina, United States of America, Department of Microbiology and Immunology, University of North Carolina at Chapel Hill, Chapel Hill, North Carolina, United States of America

\* These authors contributed equally to this work

‡ Corresponding author. E-mail: [dangl@email.unc.edu](mailto:dangl@email.unc.edu)

## 1 Abstract

2 Phosphate starvation response (PSR) in non-mycorrhizal plants comprises transcriptional reprogramming  
3 resulting in severe physiological changes to the roots and shoots and repression of plant immunity. Thus,  
4 plant-colonizing microorganisms – the plant microbiota – are exposed to direct influence by the soil’s  
5 phosphorous (P) content itself, as well as to the indirect effects of soil P on the microbial niches shaped  
6 by the plant. The individual contribution of these factors to plant microbiota assembly remains unknown.  
7 To disentangle these direct and indirect effects, we planted PSR-deficient *Arabidopsis* mutants in a long-  
8 term managed soil P gradient, and compared the composition of their shoot and root microbiota to wild  
9 type plants across different P concentrations. PSR-deficiency had a larger effect on the composition of  
10 both bacterial and fungal plant-associated microbiota composition than P concentrations in both roots  
11 and shoots. The fungal microbiota was more sensitive to P concentrations *per se* than bacteria, and less  
12 depended on the soil community composition.

13 Using a 185-member bacterial synthetic community (SynCom) across a wide P concentration gradient in  
14 an agar matrix, we demonstrated a shift in the effect of bacteria on the plant from a neutral or positive  
15 interaction to a negative one, as measured by rosette size. This phenotypic shift is accompanied by  
16 changes in microbiota composition: the genus *Burkholderia* is specifically enriched in plant tissue under P  
17 starvation. Through a community drop-out experiment, we demonstrate that in the absence of  
18 *Burkholderia* from the SynCom, plant shoots accumulate higher phosphate levels than shoots colonized  
19 with the full SynCom, only under P starvation, but not under P-replete conditions. Therefore, P-stressed  
20 plants allow colonization by latent opportunistic competitors found within their microbiome, thus  
21 exacerbating the plant’s P starvation.

## 22 Introduction

23 Plant-derived carbon is the primary energy source for terrestrial heterotrophs, most of which are  
24 microbial. The interaction of these microbial heterotrophs with plants ranges between the extremes of  
25 mutualistic symbiosis [1] and pathogenesis [2,3]. However, the vast majority of plant-associated microbial  
26 diversity, the plant microbiota, lies between these two extremes, inducing more subtle, context-  
27 dependent effects on plant health [4–6]. The microbiota consumes plant photosynthate [7–9], and it  
28 provides benefits via protection from pathogens [10–14] or abiotic stress [15,16] or by increasing nutrient  
29 bioavailability [4,17,18].

30 The microbial community composition in soil, while governed by its own set of ecological processes [19],  
31 has an immense influence on the composition of the plant microbiota [20–22]. Correlations with soil  
32 microbial diversity, and by derivation, with plant microbiota composition and diversity, were observed for  
33 soil abiotic factors such as pH [19,23–25], drought [25–30] and nutrient concentrations [19,25,31–35]. Soil  
34 nutrient concentrations, in particular orthophosphate (Pi) – the only form of phosphorous (P) that is  
35 available to plants – produce comparatively modest to unmeasurable changes in microbial community  
36 composition [35,36]. Nevertheless, available soil Pi concentrations influences where a plant-microbe  
37 interaction lies along the mutualism-pathogenicity continuum [17].

38 Non-mycorrhizal plants respond to phosphate limitation by employing a range of phosphate starvation  
39 response (PSR) mechanisms. These manifest as severe physiological and morphological changes to the  
40 root and shoot, such as lateral root growth prioritization and depletion of shoot Pi stores [37]. In  
41 Arabidopsis, most of the transcriptional PSR driving these physiological responses is controlled by the two  
42 partially redundant transcription factors PHOSPHATE STARVATION RESPONSE 1 (PHR1) and PHR1-LIKE  
43 (PHL1) [38]. As a result, the double mutant *phr1 phl1* has an impaired PSR and accumulates a low level of  
44 Pi. Pi transport into roots relies on the PHOSPHATE TRANSPORTER TRAFFIC FACILITATOR1 (PHF1) gene,  
45 which is required for membrane localization of high-affinity phosphate transporters [39]. In axenic  
46 conditions, *phf1* mutants constitutively express PSR and accumulate low levels of Pi [39].

47 The plant's response to its nutrient status is linked to its immune system. PHR1 negatively regulates  
48 components of the plant immune system, which can lead to enhanced pathogen susceptibility but also to  
49 the alteration of the plant's microbiota under phosphate starvation [4]. Arabidopsis microbiota are altered  
50 in *phr1 phl1* and *phf1* mutants [4,36] in experiments using both natural and synthetic microbial  
51 communities [4].

52 Here, we examined (i) the effect of soil phosphorus (P) content on plant microbiota composition; (ii) how  
53 PSR modulates the plant microbiota and (iii) the interplay between PSR and soil P content in shaping the  
54 plant microbiota composition. We used a combination of greenhouse experiments with differentially P-  
55 fertilized soils, Arabidopsis PSR mutants and laboratory microcosms utilizing tractable synthetic bacterial  
56 communities. Using PSR mutants planted in P-amended soil, we demonstrate that the plant PSR regulators  
57 have a profound effect on the composition of root and shoot microbiota, overshadowing the effect of the  
58 soil P content. We constructed an ecologically tractable system utilizing a complex bacterial synthetic  
59 community (SynCom) as a model of the plant root microbiome and used this system to study the  
60 interactions between microbiota assembly and abiotic stress. We demonstrate deterministic responses

61 of the SynCom members to changes in Pi concentrations, and we identify Pi-dependent plasticity along  
62 the mutualist-pathogen continuum.

## 63 Results

### 64 Phosphate starvation response in soil diverges from axenic *in vitro* assays

65 To better understand the effect of PSR genes on the plant microbiome under both Pi-limiting and Pi-  
66 replete conditions, we investigated how microbiota adapted to varying soil P levels interact with the  
67 plant's PSR. We grew wild-type (wt) *Arabidopsis* and the PSR mutants *phf1* and *phr1 phl1* in soils collected  
68 from the 'Halle long-term soil fertilization experiment', ongoing since 1949 [40]. Each transect of soil has  
69 received one of three P fertilization treatments: zero (low), 15 (medium) and 45 (high) Kg[P].Ha<sup>-1</sup>.Year<sup>-1</sup>,  
70 resulting in a 3-5 fold difference in bioavailable P between the low and high treatments [41]. To  
71 differentiate the long-term adaptive effect of P limitation on the microbial community from the effect of  
72 short-term changes in P availability, we also fertilized a subset of the low P soil at the time of planting,  
73 and designated this condition low+P (Materials and Methods 1a-c, 4a).

74 We examined whether PSR, defined and typically studied in axenic conditions, is active in our soil-based  
75 experimental system. We harvested 8-week old plants grown in the different soils and quantified  
76 developmental and molecular phenotypes typically associated with PSR in both wt plants and mutants  
77 (Materials and Methods 1d, 1g). We found a strong positive correlation among all developmental features  
78 analyzed: shoot area, shoot fresh weight and shoot Pi accumulation across all soil conditions (Fig S1A and  
79 S1 Table). Shoot Pi accumulation showed the highest signal-to-noise ratio (Fig 1A, S1B and S1C Fig). In wt  
80 plants, shoot Pi accumulation was correlated with soil P conditions (Fig 1A). As expected [42], *phr1 phl1*  
81 showed a dramatic reduction in all phenotypic parameters (Fig 1A, S1B and S1C Fig) and *phf1* accumulated  
82 less shoot Pi than wt, but did not display any obvious morphological effect (Fig 1A and S1B-S1D Fig).

83 To identify the transcriptomic signature of PSR in a low P soil, we compared the transcriptomes of the  
84 three genotypes from the low P samples to those of the low+P samples (Materials and Methods 1f, 3c, 4f-  
85 g and S2 Table). Using a likelihood ratio test (Materials and Methods 4g), we identified 210 genes that  
86 were differentially expressed across genotypes and P conditions ( $q$ -value < 0.1). After hierarchical  
87 clustering, 123 (59%) of these genes fall into a single cluster (cluster 1) of co-expressed genes that are  
88 exclusively highly expressed in wt under low P and whose expression requires *phr1 phl1* (Fig 1B). Thus,  
89 these genes represent a PSR under these experimental conditions. A gene ontology enrichment analysis  
90 (Fig 1D) illustrates that these genes are involved in processes such as ion homeostasis, detoxification and



91 response to oxidative stress. Interestingly, few PSR genes defined from *in vitro* experiments were  
92 significantly differentially expressed in our soil experiment. From a previously defined set of 193 PSR  
93 marker genes defined using seven day old seedlings exposed *in vitro* to P limitation for up to two days [4],  
94 only seven were called as significant in our experiment using eight week old plants. Nevertheless, all seven  
95 of these genes were enriched in wt in low P soil (Fig 1B and S2 Table). Surprisingly, *phf1*, which was shown  
96 *in vitro* to constitutively express PSR genes, had a gene expression profile similar to *phr1 phl1* and did not  
97 exhibit the *phr1 phl1* dependent PSR response we observed for wt. This suggests a hitherto unknown link  
98 between PHF1 and the PSR-responsive genes seen under these experimental conditions. To corroborate  
99 that the canonical *in vitro*-defined PSR is also induced in wt plants, we compared the median expression  
100 of the set of 193 PSR marker genes [4] across the different soils (Fig 1C and S1E Fig). As expected, shoot  
101 Pi content was significantly correlated with the induction of PSR marker genes (Fig 1C and S1F Fig), with  
102 the highest median expression level in the low P conditions. We conclude that while the response of eight-  
103 week old plants to low P conditions in natural soil is markedly different from *in vitro*-defined PSR, wt plants  
104 indeed respond to low P conditions in the soils tested in a Pi concentration- and *phr1 phl1*-dependent  
105 manner.

#### 106 **Bacterial and fungal plant microbiota differ in plant recruitment patterns**

107 We studied the relationship between PSR and the plant microbiome in wild-type plants and the two PSR  
108 mutants grown in all four soils. Total DNA was extracted from shoots, roots and soil and the 16S (V3-V4)  
109 and ITS1 regions were amplified and sequenced to obtain bacterial and fungal community profiles,  
110 respectively. Bacterial sequences were collapsed into amplicon sequence variants (ASVs) while fungal  
111 sequences were clustered into operational taxonomic units (OTUs) (Materials and Methods 1e, 3a-b, 4b-  
112 c). Bacterial and fungal alpha- and beta-diversity measures conform to previously published data [20,36]:  
113 Microbial diversity decreased from the soil to the root and shoot compartments (Fig 2A, 2D, S2A, S2B Fig  
114 and S3 Table) and roots and shoots harbor bacterial and fungal communities distinct from the surrounding  
115 soil community and from each other (Fig 2B, 2E, S2C-S2F Fig and S4 Table). Plant-derived samples were  
116 primarily enriched in comparison to soil with members of the phyla Proteobacteria, Bacteroidetes and  
117 Actinobacteria and depleted in members of Acidobacteria and Gemmatimonadetes (Fig 2C, S2E Fig and  
118 S4 Table). Plant-enriched fungal OTUs belonged mainly to the phyla Ascomycota (orders Hypocreales and  
119 Pleosporales) and Basidiomycota (order Agaricales). Plant-depleted fungal OTUs belonged to  
120 Saccharomycetales (Ascomycota), Holtermanniales (Basidiomycota) and Mortierellales (Zygomycota) (Fig  
121 2F, S2F Fig and S5 Table).

122 To quantify the effect of soil community composition on root and shoot microbiota composition, we used  
123 Mantel tests to detect correlation between dissimilarity matrices of the three fractions (root, shoot and  
124 soil). For bacteria, both root and shoot community dissimilarities were strongly correlated with soil (S3A  
125 and S3B Fig), while for fungi no correlation was detected with soil (S3D and S3E Fig). This observation  
126 indicates that the composition of both root and shoot communities are strongly dependent on soil  
127 community composition, despite the fact that bacterial microbiota are distinct from the soil community  
128 (Fig 2B). By contrast, the fungal microbiota composition both above and belowground is independent of  
129 the soil inoculum. This difference implies that the plant's microbiota filtering mechanisms are  
130 fundamentally different for fungi and bacteria.

### 131 **Shoot and root microbiota are both correlated and distinct**

132 Shoot and root samples are rarely analyzed in the same study [43]. We show here that roots and shoots  
133 harbor distinct communities from each other (Fig 2B, 2E, S2C-S2F Fig and S4 Table). To further explore  
134 organ specificity in the plant microbiome composition, we compared root and shoot samples at the  
135 OTU/ASV level. Shoots were mainly enriched with the bacterial phyla Cyanobacteria and Patescibacteria  
136 compared to the root, while roots were enriched with Proteobacteria, Chloroflexi and Bacteroidetes (Fig  
137 2C, S2E Fig and S4 Table). With regard to fungal orders, shoots were enriched with Capnodiales,  
138 Hypocreales and Rhizophydiales while roots were enriched with Pezizales, Xylariales and Mucorales (Fig  
139 2F, S2F Fig and S5 Table). The shoot enrichment of Cyanobacteria points to the availability of light as an  
140 important factor in niche differentiation within the plant [44–46]. We used Mantel tests to detect  
141 correlation between dissimilarity matrices of root and shoot samples. Despite the fact that they harbor  
142 distinct communities, roots and shoots were correlated with each other for both bacteria and fungi (S3C  
143 Fig and S3F Fig). Thus, while roots and shoots form distinct bacterial and fungal niches, shifts in microbiota  
144 in both of these niches are correlated, suggesting co-inoculation between plant fractions.

### 145 **The plant microbiome composition is driven by the plant PSR status.**

146 We investigated the influences of plant PSR signaling and the different soil P concentrations on microbial  
147 community composition (Materials and Methods 4c). Constrained ordination showed significant  
148 differences between both bacterial and fungal communities across the P accumulation gradients  
149 represented by the different soils and PSR mutants (Fig 3A, 3B and S4A, S4B Fig). For both bacteria and  
150 fungi, the effect of PSR status in roots was stronger than the soil P effect (Fig 3A and 3B). Notably, the  
151 effect of PSR status on the bacterial community overrides the effect of soil P (Fig 3A and S4A Fig), whereas

152 for the fungal community, both plant PSR and soil P had a strongly significant effect (Fig 3B and S4B Fig).  
153 This is contrary to previous results from the same soils where there was no detectable P effect on  
154 microbial community composition [41]. In shoots, both bacteria and fungi responded to PSR genotype,  
155 but in this case, did not respond to soil P (S4C Fig and S4D). We did not observe a significant soil  
156 P:genotype interaction effect for either bacteria or fungi (S4A and S4B Fig), confirming that *phf1* and *phr1*  
157 *phl1* both had atypical bacterial microbiomes regardless of Pi status. As expected, we did not observe a  
158 PSR effect in the soil samples (S4E and S4F Fig).

159 The relatively weak soil P effect observed here indicates that most of the soil effect on bacterial microbiota  
160 mentioned above (S3A and S3B Fig) should be explained by other edaphic factors. On the other hand, the  
161 notable genotype effect illustrates that the plant niche filtering (Fig 2B and 2E) is partly shaped by PSR.

162 To define which taxa at the ASV (Bacteria) and OTU (Fungi) levels were influenced by soil P and/or plant  
163 PSR, we applied a generalized linear model (GLM, Materials and Methods 4c) to the count datasets,  
164 contrasting the low P samples against the low+P samples. We detected 769 bacterial ASVs (S6 Table) and  
165 39 fungal OTUs (S7 Table), accounting for 23% and 24% of the bacterial and fungal abundance in the root,  
166 respectively, that were differentially abundant in at least one genotype (Fig 3C-3F). Of these, 568 bacterial  
167 ASVs and 36 of the fungal OTUs were genotype-specific, suggesting these taxa respond to PSR-regulated  
168 processes, rather than the P concentration in the soil.

169 Taken together, these results indicate that plant microbiota are relatively robust to differences in soil P  
170 content, but are sensitive to the plant PSR status. Responses to soil P concentration are contingent on PSR  
171 regulatory elements under both low and high P conditions.

## 172 **Bacterial synthetic communities modulate the plant PSR.**

173 The results obtained from the soil experiment suggest that niche sorting in the plant microbiome is not  
174 only determined by first order interactions (plant-microbe, microbe-microbe, microbe-environment), but  
175 also by higher-order interactions, such as the effect of abiotic conditions on plant-microbe interactions.  
176 This is evident in the large proportion of ASVs/OTUs that respond to soil P in a genotype-specific manner  
177 (Fig 3C-3F). To establish a system where interactions of different orders of complexity can be studied  
178 reproducibly, we constructed a plant-microbe microcosm that can be deconstructed to its individual  
179 components, while retaining a complexity that is comparable to natural ecological communities. We  
180 designed a representative bacterial synthetic community from a culture collection composed of isolates  
181 derived from surface-sterilized Arabidopsis roots [47] (Materials and Methods 2a). We selected 185

182 genome-sequenced isolates representing a typical plant-associated taxonomic distribution (Fig 4A and  
183 4B). We grew each isolate separately and mixed the grown cultures to equal optical densities. We grew  
184 7-day-old *Arabidopsis* seedlings in a Pi concentration gradient (0, 10, 30, 50, 100, 1000  $\mu\text{M}$   $\text{KH}_2\text{PO}_4$ ) and  
185 concomitantly exposed them to the bacterial SynCom on vertical agar plates for 12 days (Materials and  
186 Methods 2c-d).

187 First, we investigated whether PSR is induced in our experimental system. Similar to the natural soil-based  
188 experiment, we quantified developmental and transcriptional phenotypes associated with PSR in plants  
189 grown in different concentrations of Pi (Materials and Methods 2f-g). The presence of the SynCom  
190 consistently decreased root length across all Pi concentrations, but the Pi gradient did not affect root  
191 length (S5A Fig). Shoot size was correlated with Pi concentration, and the slope of this trend was affected  
192 by the presence of the SynCom: at High Pi the SynCom tended to increase shoot size, while at low Pi the  
193 SynCom decreased it (Fig 5A), suggesting that the microbiome plays a role in shaping the plant's response  
194 to different Pi concentrations.

195 We performed RNA-Seq on inoculated and uninoculated plants exposed to high (1000  $\mu\text{M}$ ) and low (50  
196  $\mu\text{M}$ ) Pi (Materials and Methods 3c, 4h). To confirm that our low Pi treatments induce PSR, we examined  
197 the expression of the 193 PSR markers defined in [4]. We found that 168 of the 193 PSR markers genes  
198 were significantly induced in uninoculated plants at low Pi as compared with high Pi conditions. In the  
199 presence of the SynCom, 184 out of 193 PSR marker genes were significantly induced, and the average  
200 fold change increased from 4.7 in uninoculated conditions to 11 in the presence of the SynCom (S5B Fig).  
201 We further examined whether the 123 low P responsive genes from the soil experiment (Cluster 1 in  
202 Figure 1B) are overexpressed in the agar system as well. We found that 59 of the 123 genes (47.2%) were  
203 low Pi-enriched in uninoculated plants and 72 (58.5%) were low Pi-enriched in the presence of the  
204 SynCom. The average fold change for this set of 123 genes was 1.6 in uninoculated conditions and 2.0 in  
205 the presence of the SynCom (S5C Fig). These results confirm that (i) in both our systems, wild soils and  
206 axenic conditions, PSR is induced at low Pi and (ii) the SynCom enhances this induction, similar to the  
207 results reported in [4].

## 208 **Bacterial synthetic communities display deterministic niche sorting in the plant microbiome**

209 To quantify the establishment of the SynCom in the plants, we determined bacterial community  
210 composition after 12 days of co-inoculation in roots, shoots and agar via 16S rRNA gene amplicon  
211 sequencing, mapping reads to 97 unique sequences (USeq) representing the 185-strain SynCom (Materials

212 and methods 2e, 3a, 4d-e, S8 Table). We found that plant roots and shoots sustained a higher bacterial  
213 alpha diversity than the surrounding agar (Fig 5B, S9 Table), an aspect in which our experimental system  
214 differs from a natural environment where species richness is higher in the surrounding soil than in the  
215 plant (Fig 2A). As in natural soil experimental systems, agar, roots and shoots assembled distinct bacterial  
216 communities and this difference among these three fractions explained most of the variance in  
217 community composition despite the different Pi-concentrations (Fig 5C and S5D Fig).

218 To study which strains are enriched in the root and shoot under the different Pi concentrations, we utilized  
219 a GLM (S10 Table, Materials and Methods 4d). Noticeably, plant (root and shoot) enrichment is strongly  
220 linked to phylogeny (Fig 5D) and is robust across the phosphate gradient assayed. In contrast, the root vs  
221 shoot comparison did not exhibit a significant phylogenetic signal, highlighting the fact that the ability to  
222 differentially colonize the shoot from the root under these conditions is phylogenetically scattered across  
223 the SynCom. As in the soil census, shoot, root and agar beta diversities were significantly correlated (S5E-  
224 S5G Fig).

225 We hypothesized that by establishing a standardized protocol for producing the inoculum and controlling  
226 the growth conditions, we will have created a reproducible, controlled system that prioritizes niche sorting  
227 over stochastic processes. To test this, we compared the amount of variance explained by a GLM in the  
228 natural community experiment vs the SynCom experiment. Supporting our hypothesis, only 1,518 out of  
229 3,874 measurable ASVs (32% of the total ASVs), accounting for 72% of the relative abundance in plant  
230 tissue, shift significantly between root and soil in the natural community survey, while 58 out of 97 USeqs  
231 (59%), accounting for 99% relative abundance in plant tissue, were significantly enriched or depleted in  
232 plant tissue in the SynCom experiment (Fig 5D). This difference in tractability between the soil and  
233 microcosm experiment is also evident in the PERMANOVA model results: in the soil experiment, we could  
234 explain 21% of variance in bacterial community composition (Fig 2B, and S2C Fig), whereas in the  
235 microcosm, we could explain 57% of variance (Fig 5C and S5D Fig).

236 These results indicate that plant colonization is largely deterministic in our SynCom system, as opposed  
237 to microbiomes in nature, which are strongly driven by stochastic and neutral processes of community  
238 assembly [48]. The reproducibility of this system, coupled with our ability to edit it as a tool for hypothesis-  
239 testing, is crucial to bridge ecological observation with mechanistic understanding of plant-microbiota  
240 interactions.

241 **Phosphate stress-induced changes in the root microbiome.**

242 The shifting role of the SynCom from increasing shoot size under replete Pi to decreasing shoot size and  
243 PSR induction under Pi limitation (Fig 5A and S5B Fig) can be explained by either a shift in the lifestyle of  
244 individual bacteria along the mutualist-pathogen continuum or by changes in the microbiota composition  
245 along the Pi gradient. The latter would favor the proliferation of mutualist bacteria only when sufficient  
246 nutritional requirements are met. To measure the effect of the Pi concentration in the media on the  
247 SynCom composition in wt plants, we measured alpha and beta diversity along our Pi gradient (0, 10, 30,  
248 50, 100, 1000  $\mu\text{M}$   $\text{KH}_2\text{PO}_4$ ) in roots, shoots and agar. We observed a positive correlation between alpha  
249 diversity and Pi concentrations, resembling a partial ecological diversity-productivity relationship – the  
250 prediction/observation of a bell-shaped response of ecological diversity to environmental productivity  
251 [49,50] – in roots and shoots, but not in the surrounding agar (Fig 5E). As for beta diversity, the  
252 composition of the SynCom shifted significantly along the Pi concentration gradient (Fig 5F and S6A-S6E  
253 Fig). Pi-stressed plants therefore assemble an altered microbiome, shifting from a net-positive outcome  
254 for the plant, to a net-negative one, as measured by shoot size (Fig 5A).

255 ***Burkholderia* respond to Pi stress-induced changes in the plant**

256 In a previous publication [4], we demonstrated that PHR1 negatively regulates defense-related genes  
257 under low-Pi conditions. Suppression of plant defense and consequent alterations in colonization could  
258 account for some of the shift we observed from a beneficial to a detrimental community. We thus aimed  
259 to identify bacteria that respond to Pi stress-induced changes in the plant, rather than the Pi concentration  
260 itself. To do so, we searched for USeqs that displayed a strong Pi:fraction (shoot, root, agar) interaction in  
261 our GLM (S7A Fig, S11 Table and Materials and Methods 4d). Two of the three USeqs displaying the  
262 strongest Pi:fraction interaction belonged to *Burkholderiaceae*, representing all 5 *Burkholderia* strains  
263 used in this experiment. The relative abundance of these USeqs is positively correlated with Pi  
264 concentration in the agar, but is negatively correlated with Pi concentration in the root and shoot (Fig 6A  
265 and S7B Fig). This pattern suggests that these strains are responding to physiological changes in the plant  
266 – either via a suppression of an immune mechanism that keeps them in check under high Pi, or via an  
267 unknown positive selection mechanism under low Pi.

268 To measure the physiological effect of the specific recruitment of *Burkholderia* under Pi stress on the  
269 plant, we conducted a drop-out experiment in which we compared plants inoculated with the full SynCom  
270 to plants inoculated with a SynCom excluding all five *Burkholderia* isolates. We also included a SynCom

271 excluding all members of the neighboring *Ralstonia* clade (Fig 4A), which didn't display any discernible Pi-  
272 response. We measured Pi concentrations in the shoots (a proxy for PSR) of plants grown in high (1000  
273  $\mu\text{M}$ ) and low (50  $\mu\text{M}$ ) Pi with the different SynComs. In addition, we measured shoot Pi in a re-feeding  
274 treatment with SynCom-inoculated plants grown in low (50  $\mu\text{M}$ ) Pi and then transferred to high Pi (1000  
275  $\mu\text{M}$ ) conditions. All SynCom treatments decreased shoot Pi content in the low Pi conditions compared to  
276 the uninoculated plants but recovered to a higher shoot Pi level than the uninoculated treatments upon  
277 transferring to high Pi conditions, reproducing our previous report [4] (Fig 6B). Among inoculated  
278 treatments, plants colonized with the *Burkholderia* drop-out treatment (SynCom excluding all  
279 *Burkholderia*) had a higher Pi content than either plants colonized with the full SynCom or with the  
280 *Ralstonia* drop-out SynCom only in the low Pi conditions. There was no difference in shoot Pi among the  
281 SynCom treatments in either the high Pi treatment, or following the refeeding treatment. This finding  
282 suggests that the enrichment of *Burkholderia* in plant tissue under Pi starvation can be considered a shift  
283 in the effect of bacteria on the plant from a positive interaction to a negative one. This supposition is  
284 consistent with the plant immune system gating this taxon under replete Pi but being unable to do so  
285 under PSR.

## 286 Discussion

287 Despite the fact that phosphate is a critical nutrient for plants and their microbiota, differences in  
288 phosphate content have relatively subtle effects on plant and soil microbiome compositions compared to  
289 abiotic factors like pH or drought, which cause pronounced, phylogenetically consistent changes in  
290 community configurations [19,27,29]. Several studies link host physiological response to the soil  
291 phosphate status with the bacterial [4,51] and fungal [34,36] microbiome. A recent report of *Arabidopsis*  
292 planted in a 60-year-long annual phosphorus fertilization gradient (the same soil used in the current study)  
293 showed a modest P effect on plant microbiome composition [41]. Previously, we showed that PSR mutants  
294 in *Arabidopsis* have subtly different bacterial microbiomes in Pi replete [4] conditions and a recent  
295 publication showed that PSR mutants had a slightly altered fungal microbiome in Pi replete but not in Pi  
296 depleted conditions [36].

297 Here, we analyzed fungi and bacteria side by side and demonstrated a pronounced effect of PSR  
298 impairment on both bacterial and fungal components of the plant microbiota. We noted an intriguing  
299 difference that emerged in the patterns of niche sorting between bacteria and fungi (S3A S3B, S3D and  
300 S3E Fig). The bacterial microbiota composition is strongly dependent on the soil bacterial community  
301 composition, whereas changes to the fungal microbiota are uncoupled from changes to the soil fungal



302 community composition. This indicates that the plant is markedly more selective as to the fungi allowed  
303 to proliferate in its tissue than it is with bacteria. Similar to [36], amendment of the soil with P at the time  
304 of the experiment (low P vs low+P) caused a shift in the microbial community, albeit weaker than the  
305 effect of knocking-out PSR genes. Our results show that impairment of PSR genes profoundly affects the  
306 composition of the plant microbiota, under a range of P conditions, and that observed shifts in root-  
307 derived microbial communities may not be a result of sensitivity to P concentrations, but rather a response  
308 to PSR regulation in the hosts. This raises the alternative hypotheses that PSR-regulated shifts in  
309 microbiota composition are either adaptive to the plant, or reflect opportunistic strategies by bacteria,  
310 exploiting the repression of immunity by PSR regulation [4,17]. Under the former hypothesis microbes  
311 recruited by the plant under Pi stress provide the plants with an advantage vis a vis coping with this stress,  
312 whereas under the latter, opportunistic microbes might be making a bad situation worse for the plant. In  
313 the case of *Burkholderia* in our SynCom, results support the latter hypothesis. *Burkholderia* contribute to  
314 depletion of shoot Pi stores, only under Pi-limiting conditions. However, plant-adaptive microbial  
315 recruitment under low Pi has been shown to occur as well [17]. The fact that in soil bacteria responding  
316 to PSR genes are not a monophyletic group indicates that multiple mechanisms are involved. It is likely  
317 that these mechanisms encompass both plant-adaptive and opportunistic strategies.

318 The genus *Burkholderia* emerges as a PSR-responsive taxon. We examined the effect of *Burkholderia* on  
319 shoot Pi accumulation, which we've shown to be a reliable marker for PSR (S1F Fig). We compared the  
320 effect of *Burkholderia* on shoot Pi accumulation from within a full SynCom (a realistic proxy for the  
321 bacterial community) to that of the full SynCom lacking *Burkholderia*, a strategy akin to knocking-out a  
322 gene of interest, also recently applied in [52]. The control treatment for this type of approach is the full  
323 SynCom, while in a plant-bacterium binary association experiment it would typically be sterile conditions.  
324 As both sterile conditions and binary association are strong deviations from conditions that may be  
325 encountered in the field, the results of binary association experiments may be correspondingly distorted.  
326 Using the drop-out approach, we expect to see more subtle differences, as the microbial load on the plant  
327 doesn't change much, but also that these differences be more relevant to the field; an expectation that is  
328 yet to be empirically tested. Our observation that dropping *Burkholderia* out of the SynCom increased  
329 shoot Pi in Pi limiting conditions (50  $\mu\text{M}$  Pi) but not in Pi replete conditions (1000  $\mu\text{M}$  Pi) suggests that  
330 strains in this genus shift their relationship with the plant from a seeming commensal to a  
331 competitor/pathogen. It is likely that this shift is related to the repression of plant immune function by  
332 key regulators of PSR in low Pi [4], suggesting a specific plant-dependent trade off during PSR.

333 This study shows that despite 60 years of differential fertilization, differences in PSR and in microbiome  
334 composition between the low P and high P soils are subtle, possibly because Pi status is highly buffered  
335 by the plant ionomic regulatory network [53]. Only when comparing the low P vs the P-supplemented  
336 low+P samples, is there a discernible difference in PSR (Fig 1A), which correlates to a stronger effect on  
337 microbiota composition. This suggests that bioavailable Pi added to the soil is quickly consumed, and  
338 short-term amendments are needed in order to detect changes. It is easier to produce Pi-limiting  
339 conditions *in vitro* using defined media, as evidenced from shifts in both PSR gene expression and  
340 microbiome composition in the microcosm system introduced here. Our SynCom, comprising 185  
341 genome-sequenced endophytic bacterial isolates, was designed to resemble a natural bacterial  
342 community (Fig 4B). The community assembly patterns shown for this system are highly reproducible,  
343 demonstrating that microbiome assembly is largely a deterministic process. The reproducibility and  
344 editability of this system can be used for detailed mechanistic study of the processes that determine  
345 community assembly and its influence on plant phenotype and fitness.

## 346 Materials and Methods

### 347 1. Soil P gradient experiment

#### 348 a. Collection of soil from field site

349 Soil used in this experiment was collected from the long-term Pi fertilization field (“Field D”) trial at the  
350 Julius Kühn Experimental Station at Martin Luther University of Halle-Wittenberg (51°29’45.6’’N,  
351 11°59’33.3’’E) [40,54]. Soil cores (10 cm diameter × 15 cm depth) were taken from 18 6 X 5 m unplanted  
352 plots, belonging to two strips. These plots represent three P fertilization regimens: low, medium and high  
353 P (0, 15 and 45 kg P ha<sup>-1</sup> year<sup>-1</sup>, respectively). Strips were harvested independently in the middle of March  
354 (strip 1) and beginning of April (strip 2). Approximately 2 cm of the topsoil was discarded and the  
355 remaining lower 13 cm of soil was stored at 4 °C until use. Soils were homogenized with a mesh sieve wire  
356 (5 × 5 m<sup>2</sup>) and about 300 g of soil were added to each pot (7 × 7 × 7 cm<sup>3</sup>).

#### 357 b. Experimental design

358 Each of the three *Arabidopsis* genotypes was grown in soil from all 18 plots (6 plots per P treatment). In  
359 addition, a 4<sup>th</sup> P regimen designated ‘Low+P’ was created by adding additional P to a set of pots with low  
360 P. The amount of P added to these pots is based on the difference in total P between Low and High P

361 plots. The average difference between Low and High P over all the plots is 42 mg P per kg soil [41]. Per  
362 pot, this is 12.6 mg P (accounting for 300 g soil per pot). Thus, a 10 ml solution consisting of 4.2 mg P in  
363 the form of 20% K<sub>2</sub>HPO<sub>4</sub> and 80% KH<sub>2</sub>PO<sub>4</sub> was added to the pots in 3 applications (Week 2, 4 and 6) before  
364 watering (in order to distribute the P through the soil).

365 Thus, the experiment included four soil treatments (low P, medium P, high P, low+P) and three genotypes  
366 (Col-0, *phf1* and *phr1 phl1*) with 6 independent replicates, amounting to 72 pots. Pot positions in the  
367 greenhouse was randomized.

#### 368 c. Plant growth conditions

369 *Arabidopsis thaliana* ecotype Col-0 and mutants *phf1* and *phr1 phl1* (both in the Col-0 background) were  
370 used. Seeds were surface sterilized (20 min 70% EtOH, 10 s 100% EtOH) and planted directly onto moist  
371 soil. Sown seeds were stratified for 3 days at 4 °C before being placed in a greenhouse under short-day  
372 conditions (6/18 day-night cycle; 19 to 21 °C) for 8 weeks. Germinating seedlings were thinned to four  
373 plants per pot.

#### 374 d. Sample harvest

375 After eight weeks of growth, pots were photographed, and shoot size was quantified using WinRhizo  
376 software (Regent instruments Inc. Québec, Canada). For DNA extraction, two roots, two shoots and soil  
377 from each pot were harvested separately. Roots and shoots were rinsed in sterile water to remove soil  
378 particles, placed in 2 ml Eppendorf tubes with 3 sterile glass beads, then washed three times with sterile  
379 distilled water to remove soil particles and weakly associated microbes. Root and shoot tissue were then  
380 pulverized using a tissue homogenizer (TissueLyser II; Qiagen) and stored at -80 °C until processing. Five  
381 ml of soil from each pot was suspended in 20 ml of sterile distilled water. The resulting slurry was sieved  
382 through a 100 µm sterile cell strainer (Fisher Scientific) and the flow-through was centrifuged twice at  
383 maximum speed for 20 minutes, removing the supernatant both times. The resulting pellet was stored at  
384 -80 °C until processing. For RNA extraction, one root system and one shoot were taken from three  
385 replicates of each treatment, washed lightly to remove soil particles, placed in 2 ml Eppendorf tubes with  
386 three glass beads and flash frozen with liquid nitrogen. Tubes were stored at -80 °C until processing. For  
387 shoot Pi measurement, 2-3 leaves from the remaining shoot in each pot were placed in an Eppendorf tube

388 and weighed. 1% acetic acid was then added and samples were flash frozen and stored at -80 °C until  
389 processing.

#### 390 e. DNA extraction

391 DNA extractions were carried out on ground root and shoot tissue and soil pellets, using the 96-well-  
392 format MoBio PowerSoil Kit (MoBio Laboratories; Qiagen) following the manufacturer's instruction.  
393 Sample position in the DNA extraction plates was randomized, and this randomized distribution was  
394 maintained throughout library preparation and sequencing.

#### 395 f. RNA extraction

396 RNA was purified from plant tissue using the RNeasy Plant Mini Kit (Qiagen) according to the  
397 manufacturer's instructions and stored at -80 °C.

#### 398 g. Quantification of plant phenotypes

399 The Ames method [55] was used to determine the phosphate concentration in the shoots of plants grown  
400 on different Pi regimens and treatments. Shoot area was measured using WinRhizo software (Regens  
401 Instruments Inc.).

## 402 **2. Bacterial SynCom experiment**

### 403 a. Bacterial isolation and culture

404 The 185-member bacterial synthetic community (SynCom) contained genome-sequenced isolates  
405 obtained from *Brassicaceae* roots, nearly all Arabidopsis, planted in two North Carolina, USA, soils. Since  
406 both bacteria and fungi responded similarly to PSR in our soil experiments, we only included bacteria,  
407 which are more compatible with our experimental system, in our SynCom. A detailed description of this  
408 collection and isolation procedures can be found in [47]. One week prior to each experiment, bacteria  
409 were inoculated from glycerol stocks into 600 µL KB medium in a 96 deep well plate. Bacterial cultures  
410 were grown at 28°C, shaking at 250 rpm. After five days of growth, cultures were inoculated into fresh  
411 media and returned to the incubator for an additional 48 hours, resulting in two copies of each culture, 7  
412 days old and 48 hours old. We adopted this procedure to account for variable growth rates of different  
413 SynCom members and to ensure that non-stationary cells from each strain were included in the inoculum.

414 After growth, 48-hour old and 7-day old plates were combined and optical density (OD) of the culture was  
415 measured at 600 nm using an Infinite M200 Pro plate reader (TECAN, Switzerland). All cultures were then  
416 pooled while normalizing the volume of each culture according to the OD (we took a proportionally higher  
417 volume of culture from cultures with low OD). The mixed culture was then washed twice with 10 mM  
418 MgCl<sub>2</sub> to remove spent media and cell debris and vortexed vigorously with sterile glass beads to break up  
419 aggregates. OD of the mixed, washed culture was then measured and normalized to OD=0.2. 100 µL of  
420 this SynCom inoculum was spread on each agar plate prior to transferring seedlings.

#### 421 b. Experimental design of agar experiments

422 We performed the Pi-gradient experiment in two independent replicas (experiments performed at  
423 different time, with fresh bacterial inoculum and batch of plants), each containing three internal  
424 replications, amounting to six samples for each treatment. We had two SynCom treatments: no bacteria  
425 (NB) and SynCom; six Pi concentrations: 0, 10, 30, 50, 100 or 1000 µM Pi; and two plant treatments:  
426 planted plates, and unplanted plates (NP).

427 For the drop-out experiment, the entire SynCom, *excluding* all five *Burkholderia* and both *Ralstonia*  
428 isolates was grown and prepared as described above (Materials and Methods 2a). The *Burkholderia* and  
429 *Ralstonia* isolates were grown in separate tubes, washed and added to the rest of the SynCom to a final  
430 OD of 0.001 (the calculated OD of each individual strain in a 185-Member SynCom at an OD of 0.2), to  
431 form the following four mixtures: (1) Full community – all *Burkholderia* and *Ralstonia* isolates added to  
432 the SynCom; (2) *Burkholderia* drop-out – only *Ralstonia* isolates added to the SynCom; (3) *Ralstonia* drop-  
433 out – only *Burkholderia* isolates added to the SynCom; (4) Uninoculated plants – no SynCom. The  
434 experiment had three Pi conditions: low Pi (50 µM Pi), high Pi (1000 µM Pi) and low→high Pi. 12 days  
435 post-inoculation the low Pi and high Pi samples were harvested, and the low→high plants were  
436 transferred from 50 µM Pi plates to 1000 µM Pi plates for an additional 3 days. The experiment was  
437 performed twice and each rep consisted of six plates per SynCom mixture and Pi treatment, amounting  
438 to 72 samples. Upon harvest, shoot Pi accumulation was measured using the Ames method (Materials  
439 and Methods 1g).

440 c. In vitro plant growth conditions

441 All seeds were surface-sterilized with 70% bleach, 0.2% Tween-20 for 8 min, and rinsed three times with  
442 sterile distilled water to eliminate any seed-borne microbes on the seed surface. Seeds were stratified at  
443 4 °C in the dark for two days. Plants were germinated on vertical square 10 X 10 cm agar plates with  
444 Johnson medium (JM; [4]) containing 0.5% sucrose and 1000  $\mu$ M Pi, for 7 days. Then, 10 plants were  
445 transferred to each vertical agar plate with amended JM lacking sucrose at one of the following  
446 experimental Pi concentrations: 0, 10, 30, 50, 100 or 1000  $\mu$ M Pi. The SynCom was spread on the agar  
447 prior to transferring plants. Each experiment included unplanted agar plates with SynCom for each media  
448 type (designated NP) and uninoculated plates with plants for each media type (designated NB). Plants  
449 were placed in randomized order in growth chambers and grown under a 16-h dark/8-h light regime at  
450 21°C day/18°C night for 12 days.

451 d. Sample harvest

452 Twelve days post-transferring, plates were imaged using a document scanner. For DNA extraction; roots,  
453 shoots and agar were harvested separately, pooling 6 plants for each sample. Roots and shoots were  
454 placed in 2.0 ml Eppendorf tubes with three sterile glass beads. Samples were washed three times with  
455 sterile distilled water to remove agar particles and weakly associated microbes. Tubes were stored at -80  
456 °C until processing. For RNA, samples were collected from a separate set of two independent experiments,  
457 using the same SynCom and conditions as above, but with just two Pi concentrations: 1000  $\mu$ M Pi (high)  
458 and 50  $\mu$ M Pi (low). Four seedlings were harvested from each sample and samples were flash frozen and  
459 stored at -80 °C until processing.

460 e. DNA extraction

461 Root and shoot samples were lyophilized for 48 hours using a Freezone 6 freeze dry system (Labconco)  
462 and pulverized using a tissue homogenizer (MPBio). Agar from each plate was stored in a 30 ml syringe  
463 with a square of sterilized Miracloth (Millipore) at the bottom and kept at -20 °C for a week. Syringes were  
464 then thawed at room temperature and samples were squeezed gently into 50 ml tubes. Samples were  
465 centrifuged at maximum speed for 20 minutes and most of the supernatant was discarded. The remaining  
466 1-2 ml of supernatant containing the pellet was transferred into clean microfuge tubes. Samples were  
467 centrifuged again, supernatant was removed, and pellets were stored at -80 °C until DNA extraction.

468 DNA extractions were carried out on ground root and shoot tissue and agar pellets using 96-well-format  
469 MoBio PowerSoil Kit (MOBIO Laboratories; Qiagen) following the manufacturer's instruction. Sample  
470 position in the DNA extraction plates was randomized, and this randomized distribution was maintained  
471 throughout library preparation and sequencing.

#### 472 f. RNA extraction

473 RNA was extracted from *A. thaliana* seedlings following [56]. Frozen seedlings were ground in liquid  
474 nitrogen, then homogenized in a buffer containing 400  $\mu$ l of Z6-buffer; 8 M guanidinium-HCl, 20 mM MES,  
475 20 mM EDTA at pH 7.0. 400  $\mu$ l phenol:chloroform:isoamylalcohol, 25:24:1 was added, and samples were  
476 vortexed and centrifuged (20,000 g, 10 minutes) for phase separation. The aqueous phase was transferred  
477 to a new 1.5 ml tube and 0.05 volumes of 1 N acetic acid and 0.7 volumes 96% ethanol were added. The  
478 RNA was precipitated at -20 °C overnight. Following centrifugation (20,000 g, 10 minutes, 4 °C), the pellet  
479 was washed with 200  $\mu$ l sodium acetate (pH 5.2) and 70% ethanol. The RNA was dried and dissolved in 30  
480  $\mu$ l of ultrapure water and stored at -80 °C until use.

#### 481 g. Quantification of plant phenotypes

482 The Ames method [55] was used to determine the phosphate concentration in the shoots of plants grown  
483 on different Pi regimens and treatments. Primary root length elongation was measured using ImageJ [57]  
484 and for shoot area and total root network measurement, WinRhizo software (Regens Instruments Inc.),  
485 was used.

### 486 3. DNA and RNA sequencing

#### 487 a. Bacterial 16S sequencing

488 We amplified the V3-V4 regions of the bacterial 16S rRNA gene using primers 338F (5'-ACTCCTACGGGAG  
489 GCAGCA-3') and 806R (5'-GGACTACHVGGGTWTCTAAT-3'). Two barcodes and 6 frameshifts were added  
490 to the 5' end of 338F and 6 frameshifts were added to the 806R primers, based on the protocol in [58].  
491 Each PCR reaction was performed in triplicate, and included a unique mixture of three frameshifted primer  
492 combinations for each plate. PCR conditions were as follows: 5  $\mu$ l Kapa Enhancer (Kapa Biosystems), 5  $\mu$ l  
493 Kapa Buffer A, 1.25  $\mu$ l of 5  $\mu$ M 338F, 1.25  $\mu$ l of 5  $\mu$ M 806R, 0.375  $\mu$ l mixed rRNA gene-blocking peptide  
494 nucleic acids (PNAs; 1:1 mix of 100  $\mu$ M plastid PNA and 100  $\mu$ M mitochondrial PNA; PNA Bio), 0.5  $\mu$ l Kapa



495 dNTPs, 0.2  $\mu$ l Kapa Robust Taq, 8  $\mu$ l dH<sub>2</sub>O, 5  $\mu$ l DNA; temperature cycling: 95 °C for 60 s, 24 cycles of 95 °C  
496 for 15 s, 78 °C (PNA) for 10 s, 50 °C for 30 s, 72 °C for 30 s, 4 °C until use. Following PCR cleanup, the PCR  
497 product was indexed using 96 indexed 806R primers with the same reaction mix as above, and 9 cycles of  
498 the cycling conditions described in [29]. PCR products were purified using AMPure XP magnetic beads  
499 (Beckman Coulter) and quantified with a Qubit 2.0 fluorometer (Invitrogen). Amplicons were pooled in  
500 equal amounts and then diluted to 10 pM for sequencing. Sequencing was performed on an Illumina  
501 MiSeq instrument using a 600-cycle V3 chemistry kit. The raw data for the natural soil experiment is  
502 available in the NCBI SRA Sequence Read Archive (accession XXXXXXXX). The raw data for the SynCom  
503 experiment is available in the NCBI SRA Sequence Read Archive (accession XXXXXXXX).

#### 504 b. Fungal/Oomycete ITS sequencing

505 We amplified the ITS1 region using primers ITS1-F (5'-CTTGGTCATTTAGAGGAAGTAA-3'; [59]) and ITS2 (5'-  
506 GCTGCGTTCTTCATCGATGC-3'; [60]). Samples were diluted to concentrations of 3.5 ng  $\mu$ l<sup>-1</sup> of DNA with  
507 nuclease-free water for the first PCR reaction to amplify the ITS1 region. Reactions were prepared in  
508 triplicate in 25  $\mu$ l volumes consisting of 10 ng of DNA template, 1 $\times$  incomplete buffer, 0.3% bovine serum  
509 albumin, 2 mM MgCl<sub>2</sub>, 200  $\mu$ M dNTPs, 300 nM of each primer and 2 U of DFS-Taq DNA polymerase (Bioron,  
510 Ludwigshafen, Germany); temperature cycling: 2 min at 94 °C, 25 cycles: 30 s at 94 °C, 30 s at 55 °C, and  
511 30 s at 72 °C; and termination: 10 min at 72 °C. PCR products were cleaned using an enzymatic cleanup  
512 (24.44  $\mu$ l: 20  $\mu$ l of template, 20 U of exonuclease I, 5 U of Antarctic phosphatase, 1 $\times$  Antarctic phosphatase  
513 buffer; New England Biolabs, Frankfurt, Germany); incubation conditions: (30 min at 37 °C, 15 min at 85  
514 °C; centrifuge 10 min at 4,000 rpm). A second PCR was then performed (2 min at 94 °C; 10 cycles: 30 s at  
515 94 °C, 30 s at 55 °C, and 30 s at 72 °C; and termination: 10 min at 72 °C), in triplicate using 3  $\mu$ l of cleaned  
516 PCR product and sample-specific barcoded primers (5'-  
517 AATGATACGGCGACCACCGAGATCTACTCACGCGCAGG-ITS1F-3'; 5'-CAAGCAGAAGACGGCATAACGAGAT-  
518 BARCODE(12-NT)-CGTACTGTGGAGA-ITS2-3'). PCR reactions were purified using with Agencourt AMPure  
519 XP purification kit (Beckman Coulter, Krefeld, Germany). Amplicons were pooled in equal amounts and  
520 then diluted to 10 pM for sequencing. Sequencing was performed on an Illumina MiSeq instrument using  
521 a 600-cycle V3 chemistry kit. The raw data is available in the NCBI SRA Sequence Read Archive (Project  
522 Number PRJNA531340).

523 c. Plant RNA sequencing

524 Illumina-based mRNA-Seq libraries were prepared from 1 µg RNA following [51]. mRNA was purified from  
525 total RNA using Sera-mag oligo(dT) magnetic beads (GE Healthcare Life Sciences) and then fragmented in  
526 the presence of divalent cations ( $Mg^{2+}$ ) at 94 °C for 6 minutes. The resulting fragmented mRNA was used  
527 for first-strand cDNA synthesis using random hexamers and reverse transcriptase, followed by second-  
528 strand cDNA synthesis using DNA Polymerase I and RNaseH. Double-stranded cDNA was end-repaired  
529 using T4 DNA polymerase, T4 polynucleotide kinase, and Klenow polymerase. The DNA fragments were  
530 then adenylated using Klenow exo-polymerase to allow the ligation of Illumina Truseq HT adapters (D501–  
531 D508 and D701–D712). All enzymes were purchased from Enzymatics. Following library preparation,  
532 quality control and quantification were performed using a 2100 Bioanalyzer instrument (Agilent) and the  
533 Quant-iT PicoGreen dsDNA Reagent (Invitrogen), respectively. Libraries were sequenced using Illumina  
534 HiSeq4000 sequencers to generate 50-bp single-end reads.

535 **4. Data processing and Statistical analyses**

536 a. Quantification of plant phenotypes – soil experiment

537 To measure correlation between all measured plant phenotypes (shoot Pi, shoot weight, shoot size) we  
538 applied hierarchical clustering based on the all vs all pairwise correlation coefficients between all the  
539 phenotypes measured. We used the R package corrplot v.0.84 [61] to visualize correlations. To compare  
540 shoot Pi accumulation, we performed a paired t-test between low P and P-supplemented low P (low+P)  
541 samples, within each plant genotype independently ( $\alpha < 0.05$ ).

542 b. Amplicon sequence data processing – soil experiments

543 Bacterial sequencing data was processed with MT-Toolbox [62]. Usable read output from MT-Toolbox  
544 (that is, reads with 100% correct primer and primer sequences that successfully merged with their pair)  
545 were quality filtered using Sickle [63] by not allowing any window with a Q-score under 20. After quality  
546 filtering, samples with < 3000 reads, amounting to 51 samples, all soil samples, were discarded. The  
547 resulting sequences were collapsed into amplicon sequence variants (ASVs) using the R package DADA2  
548 v1.8.1 [64]. Taxonomic assignment of each ASV was performed using the naïve Bayes kmer method  
549 implemented in the DADA2 package using the Silva 132 database as training reference [64].

550 Fungal sequencing data was processed as previously described [41]. Briefly, a combination of QIIME [65]  
551 and USEARCH [66] pipelines were used to cluster the fungal reads into 97% OTUs. Filtering of non-fungal  
552 OTUs was performed by aligning each representative against a dedicated ITS database. Finally, taxonomic  
553 assignment of each OTU was performed using the WarCup fungal ITS training set (2016) [67].

554 The resulting bacterial and fungal count tables were deposited at <https://github.com/isaig/hallepi>

555 c. Community analyses – soil experiments

556 The resulting bacterial and fungal count tables were processed and analyzed with functions from the  
557 ohchibi package [68]. Both tables were rarefied to 3000 reads per sample. An alpha diversity metric  
558 (Shannon diversity) was calculated using the diversity function from the vegan package v2.5-3 [69]. We  
559 used ANOVA to test for differences in Shannon Diversity indices between groups. Tukey's HSD post-hoc  
560 tests here and elsewhere were performed using the cld function from the emmeans R package [70]. Beta  
561 diversity analyses (Principal coordinate analysis, and canonical analysis of principal coordinates) were  
562 based on Bray-Curtis dissimilarity calculated from the rarefied abundance tables. We utilized the capscale  
563 function from the vegan R package v.2.5-3 [69] to compute a constrained analysis of principal coordinates  
564 (CAP). To analyze the full dataset (all fraction, all genotypes all phosphorus treatments), we constrained  
565 by fraction, plant genotype and phosphorus fertilization treatment, while conditioning for the plot effect.  
566 We performed the Genotype: phosphorus interaction analysis over each fraction independently,  
567 constraining for the plant genotype and phosphorus fertilization treatment while conditioning for the plot  
568 effect. In addition to CAP, we performed Permutational Multivariate Analysis of Variance (PERMANOVA)  
569 over the two datasets described above using the adonis function from the vegan package v2.5-3 [69].  
570 Finally, we used the function chibi.permanova from the ohchibi package to plot the  $R^2$  values for each  
571 significant term in the PERMANOVA model tested.

572 The relative abundance of bacterial phyla and fungal taxa were depicted using the stacked bar  
573 representation encoded in the function chibi.phylogram from the ohchibi package.

574 We used the R package DESeq2 v1.22.1 [71] to compute the enrichment profiles for both bacterial ASVs  
575 and fungal OTUs. For the full dataset model, we estimated main effects for each variable tested (Fraction,  
576 Plant Genotype, and Phosphorus fertilization) using the following design:

577 
$$\text{Abundance} \sim \text{Fraction} + \text{Genotype} + \text{Phosphorus Treatment}$$

578 We delimited ASV/OTU fraction enrichments using the following contrasts: Soil vs Root, Soil vs Shoot and  
579 Root vs Shoot. An ASV/OTU was considered statistically significant if it had q-value < 0.1.

580 We implemented a second statistical model in order to identify ASVs and OTUs that exhibited statistically  
581 significant differential abundances depending on genotype. For this analysis we utilized only root-derived  
582 low P and P-supplemented low P (low+P) treatments. We utilized a group design framework to facilitate  
583 the construction of specific contrasts. In the group variable we created, we merged the genotype and  
584 phosphate levels per sample (e.g. Col-0\_lowP, *phf1*\_low+P or *phr1 phl1*\_lowP). We controlled the paired  
585 structure of our design by adding a plot variable, resulting in the following model design:

586 
$$\text{Abundance} \sim \text{Plot} + \text{group}$$

587 We delimited 6 sets (S1, S2, S3, S4, S5, S6) of statistically significant (q-value < 0.1) ASVs/OTUs from our  
588 model using the following contrasts:

589 S1 = {Samples from Col-0, higher abundance in low treatment in comparison to low+P treatment}

590 S2 = {Samples from *phf1*, higher abundance in low treatment in comparison to low+P treatment}

591 S3 = {Samples from *phr1 phl1*, higher abundance in low treatment in comparison to low+P treatment}

592 S4 = {Samples from Col-0, higher abundance in low+P treatment in comparison to low treatment}

593 S5 = {Samples from *phf1*, higher abundance in low+P treatment in comparison to low treatment}

594 S6 = {Samples from *phr1 phl1*, higher abundance in low+P treatment in comparison to low treatment}

595 The six sets described above were used to populate Figures 3c-f.

596 The interactive visualization of the enrichment profiles was performed by converting the taxonomic  
597 assignment of each ASV/OTU into a cladogram with equidistant branch lengths using R. We used the  
598 interactive tree of life interface (iTOL) [72] to visualize this tree jointly with metadata files derived from  
599 the output of the statistical models described above. The cladograms for both bacteria and fungi can be  
600 downloaded from the links described above or via the iTOL user hallepi.

601 In order to compare beta diversity patterns across samples, we only used samples coming from pots  
602 where sequence data from all three fractions (soil root and shoot) passed quality filtering. Then, for each  
603 fraction we estimated a distance structure between samples inside that fraction using the Bray Curtis  
604 dissimilarity metric. Finally, we computed Mantel [73] correlations between pairs of distance objects (e.g.  
605 samples from Root or samples from Shoot) using the vegan package v2.5-3 [69] implementation of the  
606 Mantel test.

607 All scripts and datasets required to reproduce the soil experiment analyses are deposited in the following  
608 GitHub repository: <https://github.com/isaisg/hallepi/>.

609 d. Amplicon sequence data processing – SynCom experiments

610 SynCom sequencing data were processed with MT-Toolbox [62]. Usable read output from MT-Toolbox  
611 (that is, reads with 100% correct primer and primer sequences that successfully merged with their pair)  
612 were quality filtered using Sickle [63] by not allowing any window with Q-score under 20. The resulting  
613 sequences were globally aligned to a reference set of 16S rRNA gene sequences extracted from genome  
614 assemblies of SynCom member strains. For strains that did not have an intact 16S rRNA gene sequence in  
615 their assembly, we generated the 16S rRNA gene using Sanger sequencing. The reference database also  
616 included sequences from known bacterial contaminants and Arabidopsis organellar 16S sequences (S12  
617 table). Sequence alignment was performed with USEARCH v7.1090 [66] with the option ‘usearch\_global’  
618 at a 98% identity threshold. On average, 85% of sequences matched an expected isolate. Our 185 isolates  
619 could not all be distinguished from each other based on the V3-V4 sequence and were thus classified into  
620 97 unique sequences (USeqs). A USeq encompasses a set of identical (clustered at 100%) V3-V4 sequences  
621 coming from a single or multiple isolates.

622 Sequence mapping results were used to produce an isolate abundance table. The remaining unmapped  
623 sequences were clustered into Operational Taxonomic Units (OTUs) using UPARSE [74] implemented with  
624 USEARCH v7.1090, at 97% identity. Representative OTU sequences were taxonomically annotated with  
625 the RDP classifier [75] trained on the Greengenes database [76] (4 February 2011). Matches to Arabidopsis  
626 organelles were discarded. The vast majority of the remaining unassigned OTUs belonged to the same  
627 families as isolates in the SynCom. We combined the assigned Useq and unassigned OTU count tables into  
628 a single table.

629 The resulting count table was processed and analyzed with functions from the ohchibi package. Samples  
630 were rarefied to 1000 reads per sample. An alpha diversity metric (Shannon diversity) was calculated using  
631 the diversity function from the vegan package v2.5-3 [69]. We used ANOVA to test for differences in alpha  
632 diversity between groups. Beta diversity analyses (Principal coordinate analysis, and canonical analysis of  
633 principal coordinates) were based on were based on Bray-Curtis dissimilarity calculated from the rarefied  
634 abundance tables. We used the capscale function from the vegan R package v.2.5-3 [69] to compute the  
635 canonical analysis of principal coordinates (CAP). To analyze the full dataset (all fraction, all phosphate

636 treatments), we constrained by fraction and phosphate concentration while conditioning for the replicate  
637 effect. We performed the Fraction:Phosphate interaction analysis within each fraction independently,  
638 constraining for the phosphate concentration while conditioning for the rep effect. In addition to CAP, we  
639 performed Permutational Multivariate Analysis of Variance (PERMANOVA) analysis over the two datasets  
640 described above using the adonis function from the vegan package v2.5-3 [69]. Finally, we used the  
641 function chibi.permanova from the ohchibi package to plot the  $R^2$  values for each significant term in the  
642 PERMANOVA model tested.

643 We visualized the relative abundance of the bacterial phyla present in the SynCom using the stacked bar  
644 representation encoded in the chibi.phylogram from the ohchibi package.

645 We used the package DESeq2 v1.22.1 [71] to compute the enrichment profiles for USeqs and OTUs  
646 present in the count table. For the full dataset model, we estimated main effects for each variable tested  
647 (fraction and phosphate concentration) using the following model specification:

648  $Abundance \sim Fraction + Phosphate\ Treatment + Replicate$

649 We calculated the USeqs/OTUs fraction enrichments using the following contrasts: Agar vs Root, Agar vs  
650 Shoot and Root vs Shoot. A USeq/OTU was considered statistically significant if it had q-value < 0.1. In  
651 order to populate the heatmaps shown in Figure 5C, we grouped the Fraction and Phosphate treatment  
652 variable into a new group variable that allowed us to fit the following model:

653  $Abundance \sim Replicate + group$

654 We used the fitted model to estimate the fraction effect inside each particular phosphate level (e.g. Root  
655 vs Agar at 0Pi, or Shoot vs Agar at 1000Pi).

656 Additionally, we utilized a third model for the identification of USeqs/OTUs that exhibited a significant  
657 Fraction:Phosphate interaction between the planted agar samples and the plant fractions (Root and  
658 Shoot). Based on the beta diversity and alpha diversity results, we only used samples that were treated  
659 with 0, 10, 100 and 1000  $\mu M$  of phosphate. We grouped the samples into two categories based on their  
660 phosphate concentration, low (0  $\mu M$  and 10  $\mu M$ ) and high (100  $\mu M$  and 1000  $\mu M$ ). Then we used the  
661 following model specification to derive the desired interaction effect:

662  $Abundance \sim Fraction + Category + Fraction:Category + Replicate$

663 Finally, we subset USeqs that exhibited a significant interaction (Fraction:Category, q-value < 0.1) in the  
664 following two contrasts (Planted Agar vs Root) and (Planted Agar vs Shoot).

665 In order to compare beta diversity patterns across samples, we only used samples coming from pots  
666 where sequence data from all three fractions (soil root and shoot) passed quality filtering. Then, for each  
667 fraction we estimated a distance structure between samples inside that fraction using the Bray Curtis  
668 dissimilarity metric. Finally, we computed Mantel [73] correlations between pairs of distance objects (e.g.  
669 samples from Root or samples from Shoot) using the vegan package v2.5-3 [69] implementation of the  
670 Mantel test.

671 For the drop-out experiment, we ran an ANOVA model inside each of the phosphate treatments tested  
672 (50  $\mu\text{M}$  Pi, 1000  $\mu\text{M}$  Pi and 50 $\rightarrow$ 1000  $\mu\text{M}$  Pi). We visualized the results of the ANOVA models using the  
673 compact letter display encoded in the CLD function from the emmeans package.

674 All scripts necessary to reproduce the synthetic community analyses are deposited in the following GitHub  
675 repository: <https://github.com/isaisg/hallepi>.

#### 676 e. Phylogenetic inference of the SynCom Isolates

677 To build the phylogenetic tree of the SynCom isolates, we utilized the super matrix approach previously  
678 described in [47]. Briefly, we scanned 120 previously defined marker genes across the 185 isolate genomes  
679 from the SynCom utilizing the hmmsearch tool from the hmmer v3.1b2 [77]. Then, we selected 47 markers  
680 that were present as single copy genes in 100% of our isolates. Next, we aligned each individual marker  
681 using MAFFT [78] and filtered low quality columns in the alignment using trimAl [79]. Afterwards, we  
682 concatenated all filtered alignments into a super alignment. Finally FastTree v2.1 [80] was used to infer  
683 the phylogeny utilizing the WAG model of evolution.

684 We utilized the inferred phylogeny along with the fraction fold change results of the main effect model to  
685 compute the phylogenetic signal (Pagel's  $\lambda$ ) [81] for each contrast (Planted Agar vs Root, Planted Agar vs  
686 Shoot and Root vs Shoot) along each concentration of the phosphate gradient. The function phylosig from  
687 the R package phytools [82] was used to test for significance of the phylogenetic signal measured.

688 Multiple panel figures were constructed using the egg R package [83].

#### 689 f. RNA-Seq read processing



690 Initial quality assessment of the Illumina RNA-seq reads was performed using FastQC v0.11.7 [84].  
691 Trimmomatic v0.36 [85] was used to identify and discard reads containing the Illumina adaptor sequence.  
692 The resulting high-quality reads were then mapped against the TAIR10 [86] Arabidopsis reference genome  
693 using HISAT2 v2.1.0 [87] with default parameters. The featureCounts function from the Subread package  
694 [88] was then used to count reads that mapped to each one of the 27,206 nuclear protein-coding genes.  
695 Evaluation of the results of each step of the analysis was done with MultiQC v1.1 [89]. Raw sequencing  
696 data and read counts are available at the NCBI Gene Expression Omnibus accession number GSE129396.

#### 697 g. RNA-Seq statistical analysis – soil experiment

698 To measure the transcriptional response to Pi limitation in soil, we used the package DESeq2 v.1.22.1 [71]  
699 to define differentially expressed genes (DEGs) using the raw count table described above (Materials and  
700 Methods 4f). We used only samples from low P and P-supplemented low P (low+P) treatments along the  
701 three genotypes tested (Col-0, *phf1* and *phr1 phl1*). We combined the Genotype and Phosphorus  
702 Treatment variables into a new group variable (e.g. Col-0\_lowP or *phf1\_low+P*). Because we were  
703 interested in identifying DEGs among any pair of levels (6 levels) of the group variable (e.g. Col-0\_lowP vs  
704 Col-0\_low+P) we performed a likelihood ratio test (LRT) between a model containing the group variable  
705 and a reduced model containing only the intercept. Next, we defined DEGs as genes that had a q-value <  
706 0.1.

707 For visualization purposes, we applied a variance stabilizing transformation to the raw count gene matrix.  
708 We then standardized (z-score) each gene along the samples. We subset DEGs from this standardized  
709 matrix and for each gene calculated the mean z-score expression value in a particular level of the group  
710 variable (e.g. Col-0\_lowP); this resulted in a matrix of DEGs across the six levels in our design. Next, we  
711 created a dendrogram of DEGs by applying hierarchical clustering (method ward.D2, hclust R-base [90])  
712 to a distance object based on the correlation (dissimilarity) of the expression profiles of the genes across  
713 the six levels in our design. Finally, we delimited the cluster of DEGs by cutting the output dendrogram into  
714 five groups using the R-base cutree function [90]. Gene ontology enrichment was performed for each  
715 cluster of DEGs using the R package clusterProfiler [91].

716 For the PSR marker gene analysis we downloaded the ID of 193 genes defined in [4]. Then, we subset  
717 these genes from our standardized matrix and computed for each gene the mean z-score expression value

718 in a particular level of the group variable. Finally, we visualized the average expression of this PSR regulon  
719 across our groups of interest utilizing the function `chibi.boxplot` from the `ohchibi` package.

720 All scripts necessary to reproduce the RNA-Seq analyses are deposited in the following GitHub repository:  
721 <https://github.com/isaisg/hallepi>.

722 h. RNA-Seq statistical analysis – SynCom experiment

723 To measure the transcriptional response to Pi limitation in the SynCom microcosm, we used the package  
724 DESeq2 v.1.22.1 [71] to define differentially expressed genes (DEGs) using the raw count gene table. We  
725 combined the Bacteria (No bacteria, Full SynCom) and Phosphorus Treatment variables into a new group  
726 variable (e.g. NB\_50Pi or Full\_1000Pi). Afterwards we fitted the following model to our gene matrix:

727  $\text{Abundance Gene} \sim \text{Rep} + \text{group}$

728 Finally, utilizing the model fitted, we contrasted the phosphate treatment inside each level of the Bacteria  
729 variable (e.g. NB\_1000Pi vs NB\_50Pi). Any gene with q-value < 0.1 was defined as differentially expressed.

730 For the PSR marker gene analysis we downloaded the ID of 193 genes defined in [4]. Then, we subset  
731 these genes from our standardized matrix and computed for each gene the mean z-score expression value  
732 in a particular level of the group variable. Finally, we visualized the average expression of the PSR regulon  
733 across our groups of interest utilizing the function `chibi.boxplot` from the `ohchibi` package.

734 All scripts necessary to reproduce the RNA-Seq analyses are deposited in the following GitHub repository:  
735 <https://github.com/isaisg/hallepi>

## 736 Acknowledgments

737 We thank Dr. Wolfgang Gans and Prof. Edgar Peiter (Martin Luther University Halle-Wittenberg, Halle,  
738 Germany) for generously providing us with access to Halle soils; Prof. Paul Schulze-Lefert (Max Planck  
739 Institute for Plant Breeding Research, Cologne, Germany) for generously providing greenhouse and lab  
740 space; Stratton Barth, Julia Shen, Ellie Wilson, May Priegel and Dilan Chudasma for technical assistance  
741 throughout the project; the Dangl lab microbiome group for useful discussions; Dr. Javier Paz-Ares, Dr.  
742 Antonio Leyva (National Centre for Biotechnology, Madrid, Spain) and Dr. Connor Fitzpatrick, for critical

743 comments on the manuscript. This work was supported by NSF INSPIRE grant IOS-1343020 and DOE-USDA  
744 Feedstock Award DE-SC001043 to J.L.D. J.L.D is an Investigator of the Howard Hughes Medical Institute,  
745 supported by the HHMI. O.M.F was supported by NIH NRSA Fellowship F32-GM117758.

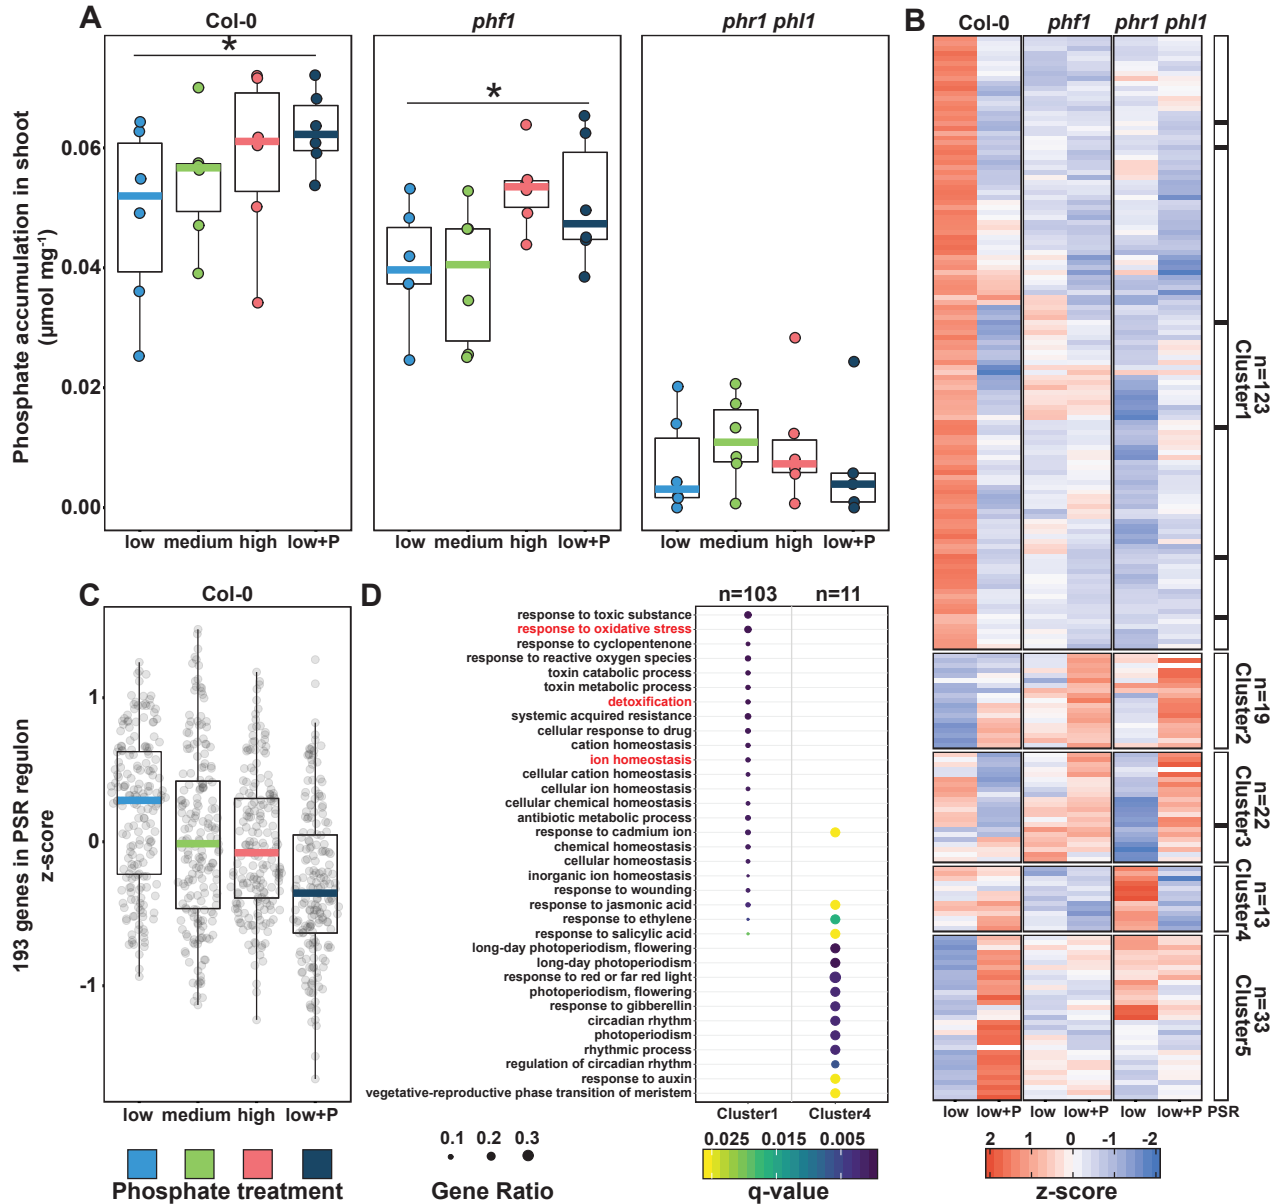

**Figure 1. Plants respond to differential P conditions in soil.**

**(A)** Free phosphate content normalized by shoot fresh weight ( $\text{mmol}\cdot\text{mg}^{-1}$ ) across wild type Col-0 plants and two PSR mutants, *phf1* and *phr1 phl1* (Materials and Methods 2a). Statistical significance between low P and low+P treatments was determined across each genotype independently by a paired t-test ( $p$ -value < 0.05). **(B)** Heatmap showing the average standardized expression of 210 differentially expressed genes (DEGs) across the low P and low+P samples in the Col-0, *phf1* and *phr1 phl1* genotypes (Materials and methods 4g). The black bar to the right highlights the distribution of seven genes belonging to the in vitro defined phosphate starvation response (PSR) marker genes [4] across the five clusters in the heatmap. **(C)** Average expression of 193 PSR marker genes [4] across the four phosphorus regimes in the Col-0 genotype (Materials and methods 4g). **(D)** Gene ontology (GO) enrichment for Clusters 1 and 4. Clusters 2, 3 and 6 did not show any statistically significant GO enrichment. The gene ratio is the proportion of genes per cluster that belong to a GO category.

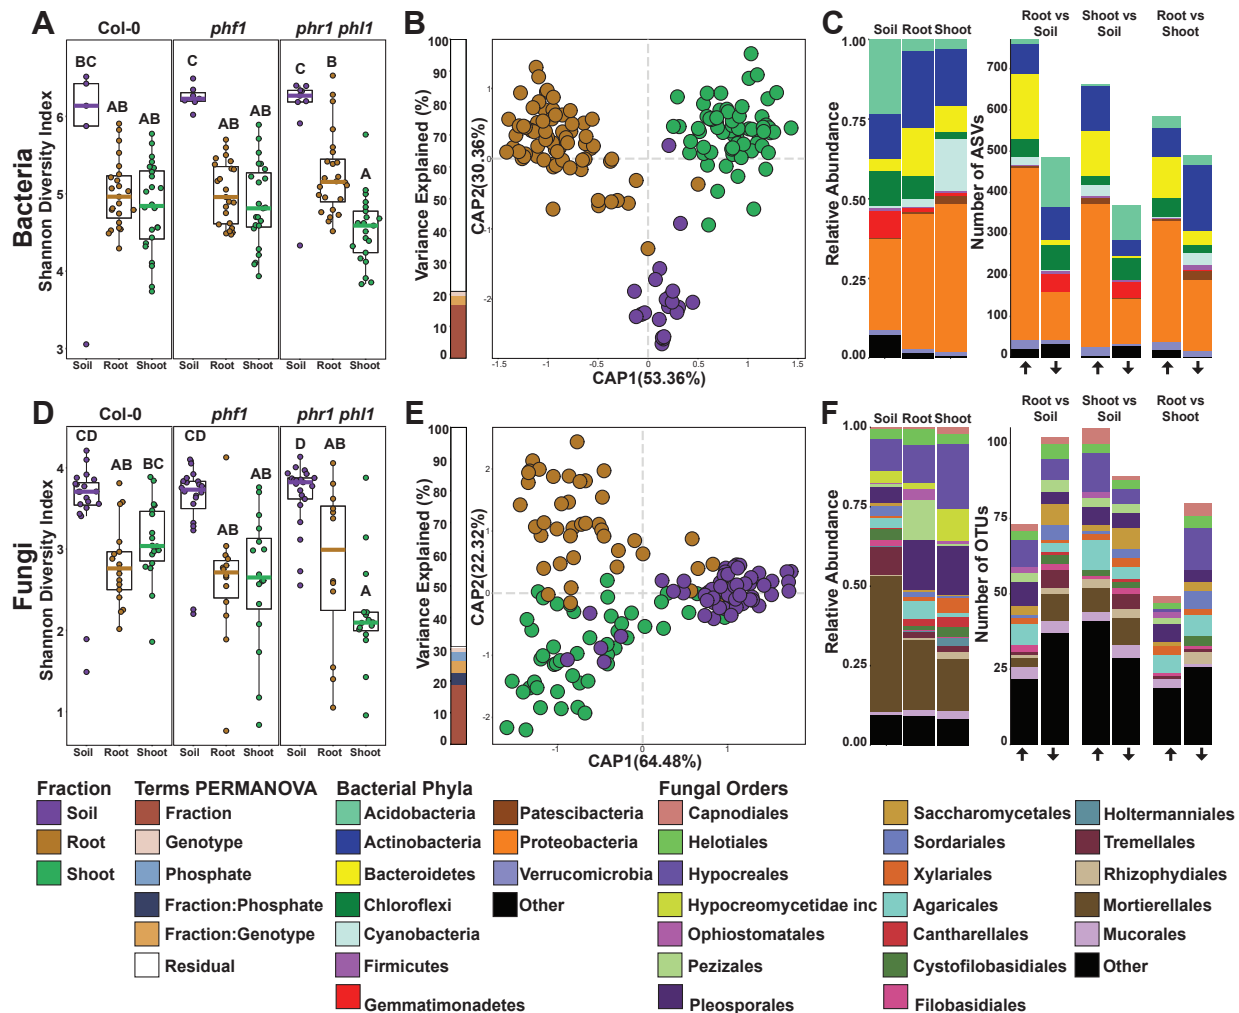

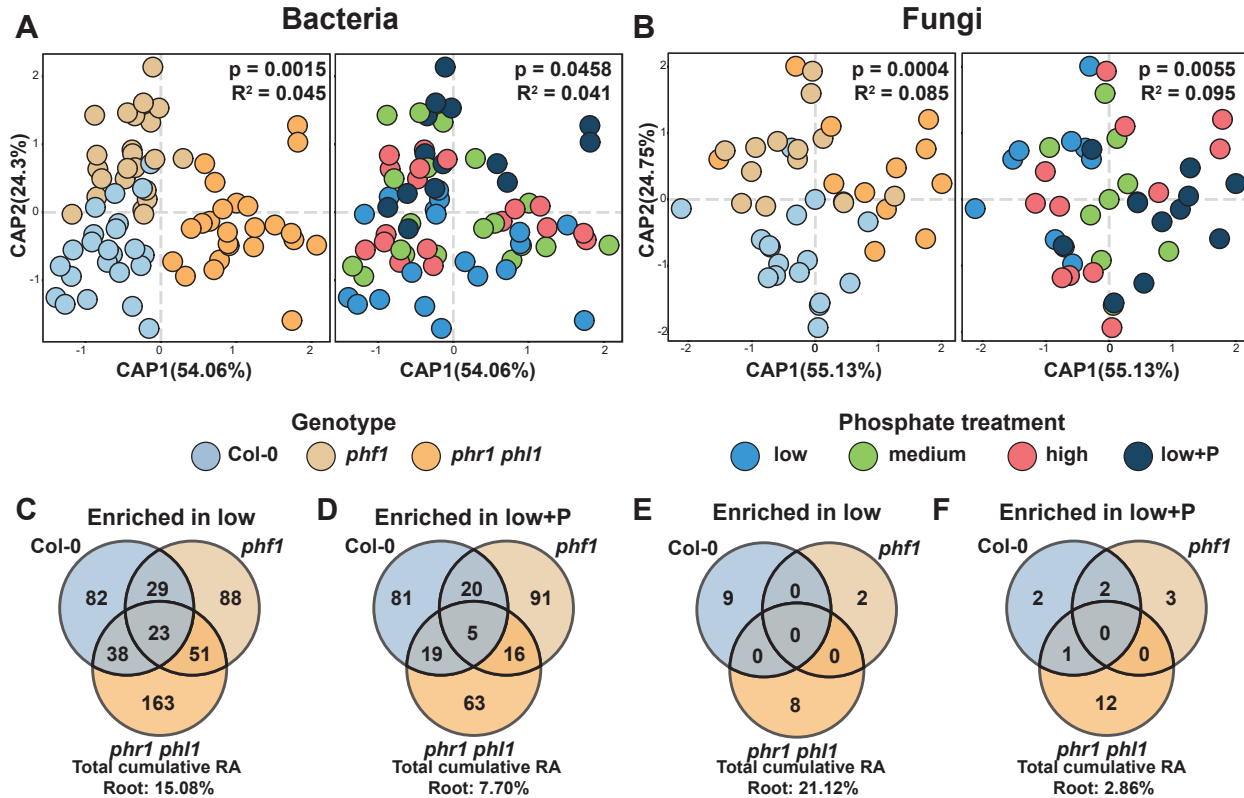

**Figure 3. Plant phosphate starvation response controls the assembly of the plant microbiome.**

(A,B) Canonical analysis of principal coordinates showing the influence of plant genotypes and soil phosphorus content over the (A) bacterial and (B) fungal communities in the root (Materials and methods 4b). The p-value and R<sup>2</sup> values inside each plot are derived from a PERMANOVA model and correspond to the genotype and phosphorus term respectively. (C,E) Venn diagrams showing the distribution of (C) bacterial ASVs and (E) fungal OTUs with statistically significant (q-value < 0.1) higher abundance in the low P treatment in comparison to the low+P treatment in the Col-0, *phf1* and *phr1 phl1* roots (Materials and methods 4b). (D,F) Venn diagrams showing the distribution of (D) bacterial ASVs and (F) fungal OTUs with statistically significant (q-value < 0.1) higher abundance in the low+P treatment in comparison to the low P treatment across the Col-0, *phf1* and *phr1 phl1* roots. RA=relative abundance.

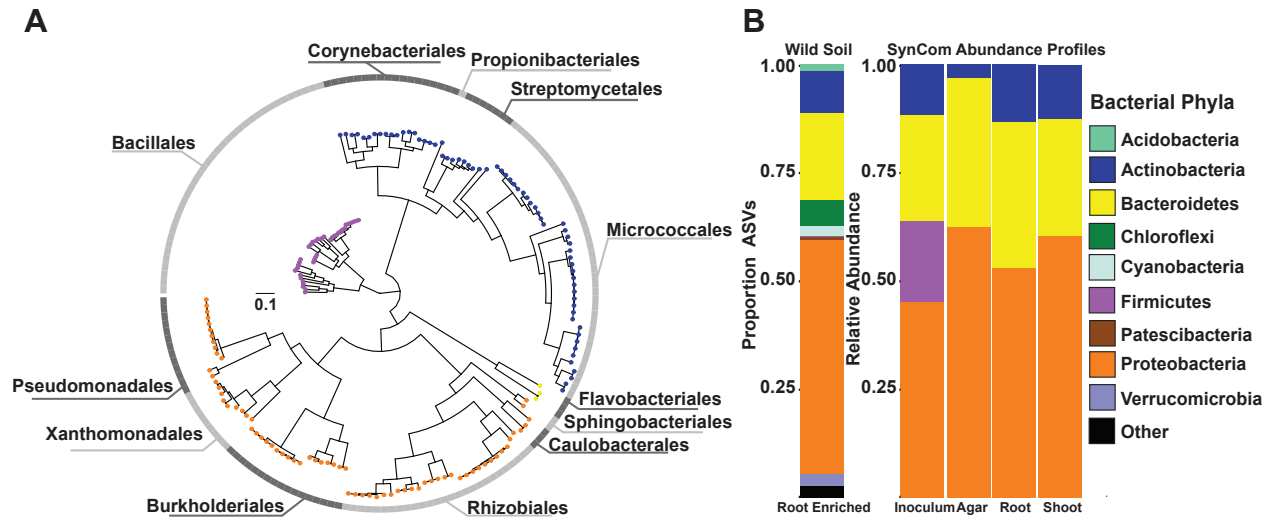

**Figure 4. Bacterial synthetic community reproduces the typical plant-associated taxonomic distribution found in soil.**

**(A)** Phylogenetic tree of 185 bacterial genomes included in the synthetic community (SynCom) (Materials and methods 4e). The tree tips are colored according to the phylum classification of the genome in **(B)**, the outer ring shows the distribution of the 12 distinct bacterial orders present in the SynCom. **(B)** Left Panel: Proportion of amplicon sequence variants (ASVs) enriched in the root in comparison to the natural soil across all treatments and genotypes based on a fitted generalized linear model ( $q$ -value  $< 0.1$ ). Each ASV is colored according to its phylum level classification. Right Panel: Relative abundance profiles of bacterial isolates across the initial bacterial inoculum, planted agar, root and shoot fractions. Each isolate is colored according to its phylum level classification based on the genome-derived taxonomy.



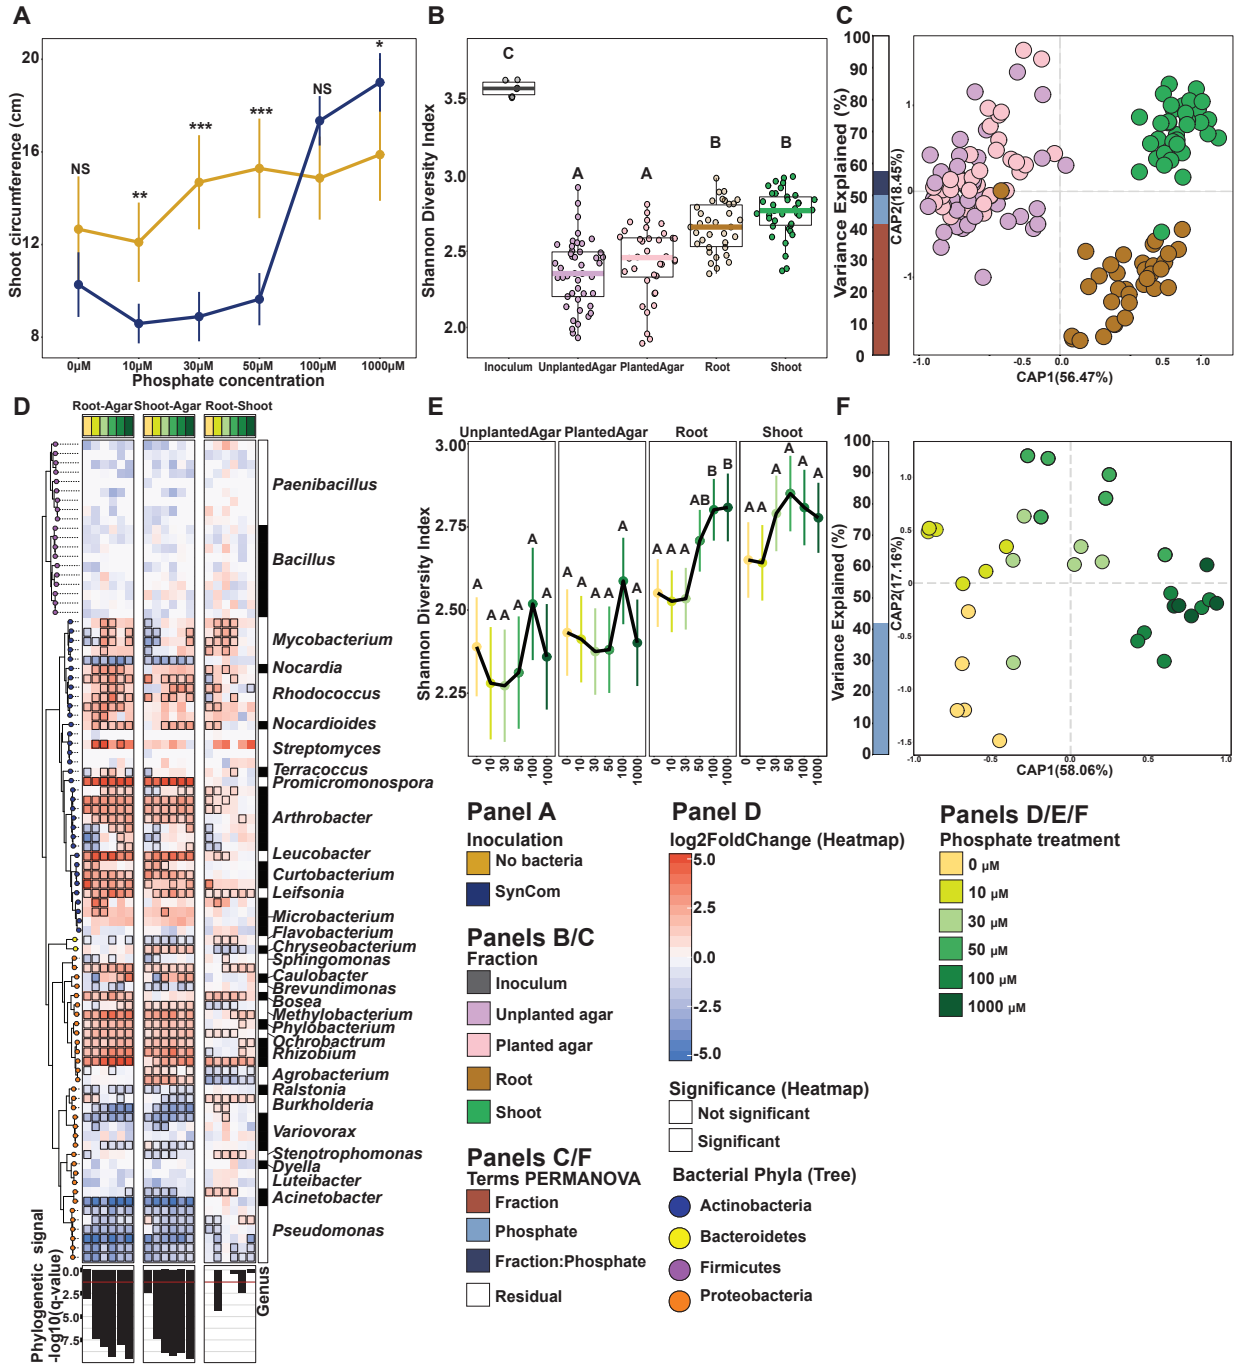

**Figure 5: Synthetic bacterial communities display deterministic niche sorting in plants.**

**(A)** Stripchart displaying the average shoot size of plants grown across a Pi gradient either in sterile conditions or with the SynCom (Materials and methods 2g). Each dot in the scatterplot represents the mean value for that particular treatment, the range crossing each dot represents the 95% confidence interval calculated. The lines are drawn to connect the means. **(B)** Alpha diversity across the fractions sampled was estimated using the Shannon Diversity index (Materials and methods 4d). An ANOVA model followed up by a Tukey HSD test were applied to estimate differences between inoculum, unplanted agar, planted agar, root and shoot fractions. Letters represent the results of the post hoc test. **(C)** Canonical analysis of principal coordinates (CAP) based on Bray Curtis dissimilarities between bacterial communities across the four fractions sampled (Materials and methods 4d). The bar graph to the left of the CAP depicts the percentage of variability explained by statistically significant ( $p$ -value < 0.05) terms in the PERMANOVA model. **(D)** Enrichment patterns of the SynCom (Materials and methods 4d). Each row along the different panels of the figure represents a USeq; a USeq encompasses a set of indistinguishable V3-V4 16S rRNA sequences present in the 185-member-SynCom. Phylogenetic tree (on the left) is colored based on the phylum-level classification of the corresponding USeq. Each column in the heatmaps represents a specific contrast in the enrichment model. We calculated root vs agar (left heatmap), shoot vs agar (middle heatmap) and root vs shoot (right heatmap) enrichments within each Pi treatment (e.g. Root\_0Pi vs Agar\_0Pi, Materials and methods 4d). The heatmaps are colored based on log<sub>2</sub> fold changes derived from the fitted GLM. Positive fold changes (colored in red gradient) represent enrichments on the left side of the name of the contrast (e.g. Root-Agar, enriched in root in comparison to agar), whereas negative fold changes (colored in blue gradient) represent enrichments on the right side of the name of the contrast (e.g. Root-Agar, enriched in agar in comparison to agar). The bottom panel depicts the transformed ( $-\log_{10}$ )  $q$ -value derived from a phylogenetic signal Pagel's  $\lambda$  test. Tests were performed per column in the heatmap (e.g. Root0 $\mu$ M pi vs Agar0 $\mu$ M pi). **(E)** Bacterial alpha diversity estimated using the Shannon Diversity index (Materials and methods 4d). Letters represent the results of the post hoc test. Lines connect the means. **(F)** Canonical analysis of principal coordinates showing the influence of phosphate on the bacterial communities in the root (Materials and methods 4d). The bar graphs to the left of the CAP depict the percentage of variability explained by statistically significant ( $p$ -value < 0.05) variables based on a PERMANOVA model.

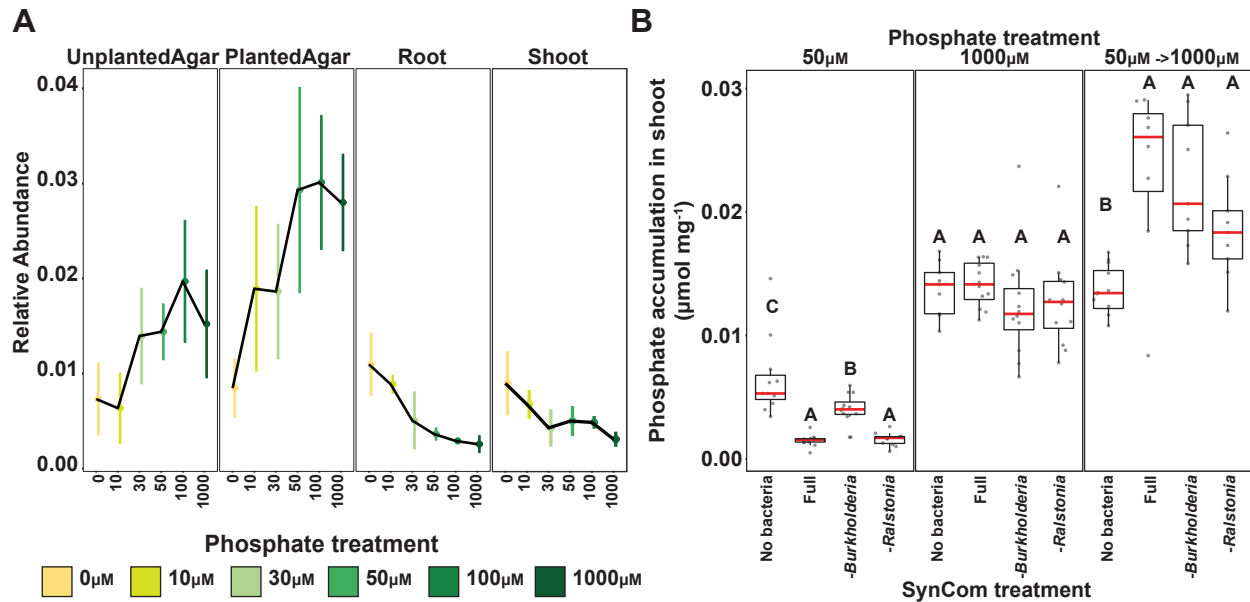

**Figure 6. Bacterial strains respond to Pi-stress-induced physiological changes in the wild type plants.** (A) Relative abundance of Burkholderia Useq 16 that exhibits a statistically significant ( $q$ -value  $< 0.1$ ) Pi-enrichment between the plant fractions and the agar fraction (Materials and methods 4d). The middle dot of each strip bar corresponds to the mean of that particular condition, the range of the strip bar corresponds to the 95% confidence interval of the mean. The lines are drawn connecting the means for each Pi concentration. (B) Boxplots showing the phosphate accumulation in plants exposed to different synthetic communities across three phosphate treatments. Statistically significant differences among SynCom treatments were computed inside each phosphate treatment separately using an ANOVA model. Letters represent the results of the post hoc test.

## References

1. Desbrosses GJ, Stougaard J. Root Nodulation: A Paradigm for How Plant-Microbe Symbiosis Influences Host Developmental Pathways. *Cell Host Microbe*. 2011;10: 348–358. doi:10.1016/j.chom.2011.09.005
2. Hacquard S, Kracher B, Hiruma K, Münch PC, Garrido-Oter R, Thon MR, et al. Survival trade-offs in plant roots during colonization by closely related beneficial and pathogenic fungi. *Nat Commun*. 2016;7: 11362. doi:10.1038/ncomms11362
3. Dangl JL, Jones JDG. Plant pathogens and integrated defence responses to infection. *Nature*. 2001;411: 826–833. doi:10.1038/35081161
4. Castrillo G, Teixeira PJPL, Paredes SH, Law TF, de Lorenzo L, Feltcher ME, et al. Root microbiota drive direct integration of phosphate stress and immunity. *Nature*. 2017;543: 513–518. doi:10.1038/nature21417
5. Hacquard S, Spaepen S, Garrido-Oter R, Schulze-Lefert P. Interplay Between Innate Immunity and the Plant Microbiota. *Annu Rev Phytopathol*. 2017;55: 565–589. doi:10.1146/annurev-phyto-080516-035623
6. Haney CH, Samuel BS, Bush J, Ausubel FM, Gallo RL, Hooper L V., et al. Associations with rhizosphere bacteria can confer an adaptive advantage to plants. *Nat Plants*. 2015;1: 15051. doi:10.1038/nplants.2015.51
7. Pickles BJ, Wilhelm R, Asay AK, Hahn AS, Simard SW, Mohn WW. Transfer of <sup>13</sup>C between paired Douglas-fir seedlings reveals plant kinship effects and uptake of exudates by ectomycorrhizas. *New Phytol*. 2016;214: 400-411. doi:10.1111/nph.14325
8. Hernández M, Dumont MG, Yuan Q, Conrad R. Different bacterial populations associated with the roots and rhizosphere of rice incorporate plant-derived carbon. *Appl Environ Microbiol*. 2015;81: 2244–53. doi:10.1128/AEM.03209-14
9. Eissfeller V, Beyer F, Valtanen K, Hertel D, Maraun M, Polle A, et al. Incorporation of plant carbon and microbial nitrogen into the rhizosphere food web of beech and ash. *Soil Biol Biochem*. 2013;62: 76–81. doi:10.1016/j.soilbio.2013.03.002
10. Hu J, Wei Z, Friman V-P, Gu S-H, Wang X-F, Eisenhauer N, et al. Probiotic Diversity Enhances Rhizosphere Microbiome Function and Plant Disease Suppression. *MBio*. 2016;7: e01790-16.

doi:10.1128/mBio.01790-16

11. Santhanam R, Luu VT, Weinhold A, Goldberg J, Oh Y, Baldwin IT. Native root-associated bacteria rescue a plant from a sudden-wilt disease that emerged during continuous cropping. *Proc Natl Acad Sci U S A*. 2015;112: E5013-20. doi:10.1073/pnas.1505765112
12. Mendes R, Kruijt M, de Bruijn I, Dekkers E, van der Voort M, Schneider JHM, et al. Deciphering the Rhizosphere Microbiome for Disease-Suppressive Bacteria. *Science*. 2011;332: 1097–1100. doi:10.1126/science.1203980
13. Shen Z, Ruan Y, Xue C, Zhong S, Li R, Shen Q. Soils naturally suppressive to banana Fusarium wilt disease harbor unique bacterial communities. *Plant Soil*. 2015;393: 21–33. doi:10.1007/s11104-015-2474-9
14. Cha J-Y, Han S, Hong H-J, Cho H, Kim D, Kwon Y, et al. Microbial and biochemical basis of a Fusarium wilt-suppressive soil. *ISME J*. 2016;10: 119–129. doi:10.1038/ismej.2015.95
15. Yuan Z, Druzhinina IS, Labbé J, Redman R, Qin Y, Rodriguez R, et al. Specialized Microbiome of a Halophyte and its Role in Helping Non-Host Plants to Withstand Salinity. *Sci Rep*. 2016;6: 32467. doi:10.1038/srep32467
16. Vargas L, Santa Brígida AB, Mota Filho JP, de Carvalho TG, Rojas CA, Vaneechoutte D, et al. Drought Tolerance Conferred to Sugarcane by Association with *Gluconacetobacter diazotrophicus*: A Transcriptomic View of Hormone Pathways. *PLoS One*. 2014;9: e114744. doi:10.1371/journal.pone.0114744
17. Hiruma K, Gerlach N, Sacristán S, Nakano RT, Hacquard S, Kracher B, et al. Root Endophyte *Colletotrichum tofieldiae* Confers Plant Fitness Benefits that Are Phosphate Status Dependent. *Cell*. 2016;165: 464–474. doi:10.1016/j.cell.2016.02.028
18. Vessey JK. Plant growth promoting rhizobacteria as biofertilizers. *Plant Soil*. 2003;255: 571–586. doi:10.1023/A:1026037216893
19. Fierer N, Jackson RB. The diversity and biogeography of soil bacterial communities. *Proc Natl Acad Sci U S A*. 2006;103: 626–31. doi:10.1073/pnas.0507535103
20. Lundberg DS, Lebeis SL, Paredes SH, Yourstone S, Gehring J, Malfatti S, et al. Defining the core *Arabidopsis thaliana* root microbiome. *Nature*. *Nature Research*; 2012;488: 86–90. doi:10.1038/nature11237

21. Yeoh YK, Paungfoo-Lonhienne C, Dennis PG, Robinson N, Ragan MA, Schmidt S, et al. The core root microbiome of sugarcane cultivated under varying nitrogen fertilizer application. *Environ Microbiol.* 2016;18: 1338–1351. doi:10.1111/1462-2920.12925
22. Edwards J, Johnson C, Santos-medellín C, Lurie E, Kumar N. Structure , variation , and assembly of the root-associated microbiomes of rice. *Proc Natl Acad Sci U S A.* 2015;112: E911–E920. doi:10.1073/pnas.1414592112
23. Zhalnina K, Dias R, de Quadros PD, Davis-Richardson A, Camargo FAO, Clark IM, et al. Soil pH Determines Microbial Diversity and Composition in the Park Grass Experiment. *Microb Ecol.* 2015;69: 395–406. doi:10.1007/s00248-014-0530-2
24. Lauber CL, Hamady M, Knight R, Fierer N. Pyrosequencing-based assessment of soil pH as a predictor of soil bacterial community structure at the continental scale. *Appl Environ Microbiol.* 2009;75: 5111–20. doi:10.1128/AEM.00335-09
25. Griffiths RI, Thomson BC, James P, Bell T, Bailey M, Whiteley AS. The bacterial biogeography of British soils. *Environ Microbiol.* 2011;13: 1642–1654. doi:10.1111/j.1462-2920.2011.02480.x
26. Santos-Medellín C, Edwards J, Liechty Z, Nguyen B, Sundaresan V. Drought Stress Results in a Compartment-Specific Restructuring of the Rice Root-Associated Microbiomes. *MBio.* 2017;8: e00764-17. doi:10.1128/mBio.00764-17
27. Naylor D, DeGraaf S, Purdom E, Coleman-Derr D. Drought and host selection influence bacterial community dynamics in the grass root microbiome. *ISME J.* 2017; doi:10.1038/ismej.2017.118
28. Angel R, Soares MIM, Ungar ED, Gillor O. Biogeography of soil archaea and bacteria along a steep precipitation gradient. *ISME J.* 2010;4: 553–563. doi:10.1038/ismej.2009.136
29. Xu L, Naylor D, Dong Z, Simmons T, Pierroz G, Hixson KK, et al. Drought delays development of the sorghum root microbiome and enriches for monoderm bacteria. *Proc Natl Acad Sci U S A.* 2018;115: E4284–E4293. doi:10.1073/pnas.1717308115
30. Fitzpatrick CR, Copeland J, Wang PW, Guttman DS, Kotanen PM, Johnson MTJ. Assembly and ecological function of the root microbiome across angiosperm plant species. *Proc Natl Acad Sci U S A.* 2018;115: E1157–E1165. doi:10.1073/pnas.1717617115
31. Ramirez KS, Craine JM, Fierer N. Consistent effects of nitrogen amendments on soil microbial communities and processes across biomes. *Glob Chang Biol.* 2012;18: 1918–1927. doi:10.1111/j.1365-2486.2012.02639.x

32. Fierer N, Lauber CL, Ramirez KS, Zaneveld J, Bradford MA, Knight R. Comparative metagenomic, phylogenetic and physiological analyses of soil microbial communities across nitrogen gradients. *ISME J.* 2012;6: 1007–17. doi:10.1038/ismej.2011.159
33. Pantigoso HA, Manter DK, Vivanco JM. Phosphorus addition shifts the microbial community in the rhizosphere of blueberry (*Vaccinium corymbosum* L.). *Rhizosphere.* 2018;7: 1–7. doi:10.1016/J.RHISPH.2018.06.008
34. Yu P, Wang C, Baldauf JA, Tai H, Gutjahr C, Hochholdinger F, et al. Root type and soil phosphate determine the taxonomic landscape of colonizing fungi and the transcriptome of field-grown maize roots. *New Phytol.* Wiley/Blackwell (10.1111); 2018;217: 1240–1253. doi:10.1111/nph.14893
35. Leff JW, Jones SE, Prober SM, Barberán A, Borer ET, Firn JL, et al. Consistent responses of soil microbial communities to elevated nutrient inputs in grasslands across the globe. *Proc Natl Acad Sci U S A.* 2015;112: 10967–72. doi:10.1073/pnas.1508382112
36. Fabiańska I, Gerlach N, Almario J, Bucher M. Plant-mediated effects of soil phosphorus on the root-associated fungal microbiota in *Arabidopsis thaliana*. *New Phytol.* 2018;221: 2123–2137. doi:10.1111/nph.15538
37. Raghothama KG. PHOSPHATE ACQUISITION. *Annu Rev Plant Physiol Plant Mol Biol.* 1999;50: 665–693. doi:10.1146/annurev.arplant.50.1.665
38. Bustos R, Castrillo G, Linhares F, Puga MI, Rubio V, Pérez-Pérez J, et al. A Central Regulatory System Largely Controls Transcriptional Activation and Repression Responses to Phosphate Starvation in *Arabidopsis*. Ecker JR, editor. *PLoS Genet.* 2010;6: e1001102. doi:10.1371/journal.pgen.1001102
39. Gonzalez E, Solano R, Rubio V, Leyva A, Paz-Ares J. PHOSPHATE TRANSPORTER TRAFFIC FACILITATOR1 Is a Plant-Specific SEC12-Related Protein That Enables the Endoplasmic Reticulum Exit of a High-Affinity Phosphate Transporter in *Arabidopsis*. *PLANT CELL ONLINE.* 2005;17: 3500–3512. doi:10.1105/tpc.105.036640
40. Gransee A, Merbach W. Phosphorus dynamics in a long-term P fertilization trial on Luvic Phaeozem at Halle. *J Plant Nutr Soil Sci.* 2000;163: 353–357. doi:10.1002/1522-2624(200008)163:4<353::AID-JPLN353>3.0.CO;2-B
41. Robbins C, Thiergart T, Hacquard S, Garrido-Oter R, Gans W, Peiter E, et al. Root-Associated



- Bacterial and Fungal Community Profiles of *Arabidopsis thaliana* Are Robust Across Contrasting Soil P Levels. *Phytobiomes*. *Phytobiomes*; 2018;2: PBIOMES-09-17-0. doi:10.1094/PBIOMES-09-17-0042-R
42. Phillipson BA. PHOSPHATE TRANSPORTER TRAFFIC FACILITATOR1 Is a Plant-Specific SEC12-Related Protein That Enables the Endoplasmic Reticulum Exit of a High-Affinity Phosphate Transporter in *Arabidopsis*. *Plant Cell Online*. 2005;17: 3500–3512. doi:10.1105/tpc.105.036640
  43. Knief C, Delmotte N, Chaffron S, Stark M, Innerebner G, Wassmann R, et al. Metaproteogenomic analysis of microbial communities in the phyllosphere and rhizosphere of rice. *ISME J*. 2012;6: 1378–1390. doi:10.1038/ismej.2011.192
  44. Atamna-Ismaeel N, Finkel OM, Glaser F, Sharon I, Schneider R, Post AF, et al. Microbial rhodopsins on leaf surfaces of terrestrial plants. *Environ Microbiol*. 2012;14. doi:10.1111/j.1462-2920.2011.02554.x
  45. Atamna-Ismaeel N, Finkel O, Glaser F, von Mering C, Vorholt JA, Koblížek M, et al. Bacterial anoxygenic photosynthesis on plant leaf surfaces. *Environ Microbiol Rep*. 2012;4: 209–216. doi:10.1111/j.1758-2229.2011.00323.x
  46. Finkel OM, Delmont TO, Post AF, Belkin S. Metagenomic signatures of bacterial adaptation to life in the phyllosphere of a salt-secreting desert tree. *Appl Environ Microbiol*. 2016;82. doi:10.1128/AEM.00483-16
  47. Levy A, Salas Gonzalez I, Mittelviehhaus M, Clingenpeel S, Herrera Paredes S, Miao J, et al. Genomic features of bacterial adaptation to plants. *Nat Genet*. 2018;50: 138–150. doi:10.1038/s41588-017-0012-9
  48. Sieber M, Pita L, Weiland-Bräuer N, Dirksen P, Wang J, Mortzfeld B, et al. The Neutral Metaorganism. *bioRxiv*. 2018; 367243. doi:10.1101/367243
  49. Kassen R, Buckling A, Bell G, Rainey PB. Diversity peaks at intermediate productivity in a laboratory microcosm. *Nature*. 2000;406: 508–512. doi:10.1038/35020060
  50. Tilman D. Resource competition and community structure. Princeton University Press; 1982.
  51. Herrera Paredes S, Gao T, Law TF, Finkel OM, Mucyn T, Teixeira PJPL, et al. Design of synthetic bacterial communities for predictable plant phenotypes. Kemen E, editor. *PLOS Biol*. 2018;16: e2003962. doi:10.1371/journal.pbio.2003962

52. Durán P, Thiergart T, Garrido-Oter R, Agler M, Kemen E, Schulze-Lefert P, et al. Microbial Interkingdom Interactions in Roots Promote Arabidopsis Survival. *Cell*. 2018;175: 973–983. doi:10.1016/j.cell.2018.10.020
53. Baxter IR, Vitek O, Lahner B, Muthukumar B, Borghi M, Morrissey J, et al. The leaf ionome as a multivariable system to detect a plant's physiological status. *Proc Natl Acad Sci U S A*. 2008;105: 12081–12086. doi:10.1073/pnas.0804175105
54. Merbach W, Garz J, Schliephake W, Stumpe H, Schmidt L. The long-term fertilization experiments in Halle (Saale), Germany — Introduction and survey. *J Plant Nutr Soil Sci*. 2000;163: 629–638. doi:10.1002/1522-2624(200012)163:6<629::AID-JPLN629>3.0.CO;2-P
55. Ames BN. [10] Assay of inorganic phosphate, total phosphate and phosphatases. *Methods Enzymol*. 1966;8: 115–118. doi:10.1016/0076-6879(66)08014-5
56. Logemann J, Schell J, Willmitzer L. Improved method for the isolation of RNA from plant tissues. *Anal Biochem*. 1987;163: 16–20. doi:10.1016/0003-2697(87)90086-8
57. Schindelin J, Arganda-Carreras I, Frise E, Kaynig V, Longair M, Pietzsch T, et al. Fiji: an open-source platform for biological-image analysis. *Nat Methods*. 2012;9: 676–682. doi:10.1038/nmeth.2019
58. Lundberg DS, Yourstone S, Mieczkowski P, Jones CD, Dangl JL. Practical innovations for high-throughput amplicon sequencing. *Nat Methods*. 2013;10: 999–1002. doi:10.1038/nmeth.2634
59. Gardes M, Bruns TD. ITS primers with enhanced specificity for basidiomycetes - application to the identification of mycorrhizae and rusts. *Mol Ecol*. 1993;2: 113–118. doi:10.1111/j.1365-294X.1993.tb00005.x
60. White TJ, Bruns TD, Lee SB, Taylor JW. Amplification and direct sequencing of fungal ribosomal RNA genes for phylogenetics. *PCR protocols: A Guide to Methods and Applications*. 1990. pp. 315–322. doi:10.1016/B978-0-12-372180-8.50042-1
61. Taiyun Wei M, Taiyun Wei cre A, Simko aut V, Levy ctb M, Xie ctb Y, Jin ctb Y, et al. Package “corrplot”. 2017. Available from: <https://cran.r-project.org/web/packages/corrplot/corrplot.pdf>
62. Yourstone SM, Lundberg DS, Dangl JL, Jones CD. MT-Toolbox: improved amplicon sequencing using molecule tags. *BMC Bioinformatics*. 2014;15: 284. doi:10.1186/1471-2105-15-284
63. Joshi N, Fass J. Sickle: A sliding-window, adaptive, quality-based trimming tool for FastQ files (Version 1.33) [Software]. 2011. Available from: <https://github.com/najoshi/sickle>.

64. Callahan BJ, McMurdie PJ, Rosen MJ, Han AW, Johnson AJA, Holmes SP. DADA2: High-resolution sample inference from Illumina amplicon data. *Nat Methods*. 2016;13: 581–583. doi:10.1038/nmeth.3869
65. Caporaso JG, Kuczynski J, Stombaugh J, Bittinger K, Bushman FD, Costello EK, et al. QIIME allows analysis of high-throughput community sequencing data. *Nat Methods*. 2010;7: 335–336. doi:10.1038/nmeth.f.303
66. Edgar RC. Search and clustering orders of magnitude faster than BLAST. *Bioinformatics*. 2010;26: 2460–2461. doi:10.1093/bioinformatics/btq461
67. Deshpande V, Wang Q, Greenfield P, Charleston M, Porras-Alfaro A, Kuske CR, et al. Fungal identification using a Bayesian classifier and the Warcup training set of internal transcribed spacer sequences. *Mycologia*. 2016;108: 1–5. doi:10.3852/14-293
68. Salas Gonzalez I. *isaig/ohchibi: iskali*. 2019; doi:10.5281/ZENODO.2593691
69. Oksanen J, Blanchet FG, Kindt R, Legendre P, Minchin PR, O’hara RB, et al. Package “vegan”. 2015. Available from: <https://cran.r-project.org/web/packages/vegan/vegan.pdf>
70. Lenth R, Singmann H, Love J, Buerkner P, Herve, M. Package “emmeans”. 2019; doi:10.1080/00031305.1980.10483031. Available from: <https://cran.r-project.org/web/packages/emmeans/emmeans.pdf>
71. Love MI, Huber W, Anders S. Moderated estimation of fold change and dispersion for RNA-seq data with DESeq2. *Genome Biol*. 2014;15: 550. doi:10.1186/s13059-014-0550-8
72. Letunic I, Bork P. Interactive tree of life (iTOL) v3: an online tool for the display and annotation of phylogenetic and other trees. *Nucleic Acids Res*. 2016;44: W242–W245. doi:10.1093/nar/gkw290
73. Mantel N. The detection of disease clustering and a generalized regression approach. *Cancer Res*. 1967;27: 209–20.
74. Edgar RC. UPARSE: highly accurate OTU sequences from microbial amplicon reads. *Nat Methods*. 2013;10: 996–998. doi:10.1038/nmeth.2604
75. Wang Q, Garrity GM, Tiedje JM, Cole JR. Naive Bayesian Classifier for Rapid Assignment of rRNA Sequences into the New Bacterial Taxonomy. *Appl Environ Microbiol*. 2007;73: 5261–5267. doi:10.1128/AEM.00062-07
76. DeSantis TZ, Hugenholtz P, Larsen N, Rojas M, Brodie EL, Keller K, et al. Greengenes, a chimera-

- checked 16S rRNA gene database and workbench compatible with ARB. *Appl Environ Microbiol.* 2006;72: 5069–72. doi:10.1128/AEM.03006-05
77. Wheeler TJ, Eddy SR. nhmmer: DNA homology search with profile HMMs. *Bioinformatics.* 2013;29: 2487–2489. doi:10.1093/bioinformatics/btt403
78. Katoh K, Standley DM. MAFFT multiple sequence alignment software version 7: improvements in performance and usability. *Mol Biol Evol.* 2013;30: 772–80. doi:10.1093/molbev/mst010
79. Capella-Gutiérrez S, Silla-Martínez JM, Gabaldón T. trimAl: a tool for automated alignment trimming in large-scale phylogenetic analyses. *Bioinformatics.* 2009;25: 1972–3. doi:10.1093/bioinformatics/btp348
80. Price MN, Dehal PS, Arkin AP. FastTree 2 – Approximately Maximum-Likelihood Trees for Large Alignments. *PLoS One.* 2010;5: e9490. doi:10.1371/journal.pone.0009490
81. Harvey, Pagel M. *The comparative method in evolutionary biology.* Oxford: Oxford University Press; 1991.
82. Revell LJ. phytools: an R package for phylogenetic comparative biology (and other things). *Methods Ecol Evol.* 2012;3: 217–223. doi:10.1111/j.2041-210X.2011.00169.x
83. Auguie B. Package “egg”. 2018. Available from: <https://cran.r-project.org/web/packages/egg/egg.pdf>
84. Andrews S. Babraham Bioinformatics - FastQC A Quality Control tool for High Throughput Sequence Data [Internet]. 2018. Available from: <https://www.bioinformatics.babraham.ac.uk/projects/fastqc/>. Cited 11 April 2019
85. Bolger AM, Lohse M, Usadel B. Trimmomatic: a flexible trimmer for Illumina sequence data. *Bioinformatics.* 2014;30: 2114–20. doi:10.1093/bioinformatics/btu170
86. Berardini TZ, Reiser L, Li D, Mezheritsky Y, Muller R, Strait E, et al. The arabidopsis information resource: Making and mining the “gold standard” annotated reference plant genome. *genesis.* 2015;53: 474–485. doi:10.1002/dvg.22877
87. Kim D, Langmead B, Salzberg SL. HISAT: a fast spliced aligner with low memory requirements. *Nat Methods.* 2015;12: 357–60. doi:10.1038/nmeth.3317
88. Liao Y, Smyth GK, Shi W. The Subread aligner: fast, accurate and scalable read mapping by seed-and-vote. *Nucleic Acids Res.* 2013;41: e108. doi:10.1093/nar/gkt214

89. Ewels P, Magnusson M, Lundin S, Källner M. MultiQC: summarize analysis results for multiple tools and samples in a single report. *Bioinformatics*. Narnia; 2016;32: 3047–3048.  
doi:10.1093/bioinformatics/btw354
90. Team RDC. R: A language and environment for statistical computing. 2011. Available from: <https://www.r-project.org/>
91. Yu G, Wang L-G, Han Y, He Q-Y. clusterProfiler: an R Package for Comparing Biological Themes Among Gene Clusters. *O MICS*. 2012;16: 284. doi:10.1089/OMI.2011.0118

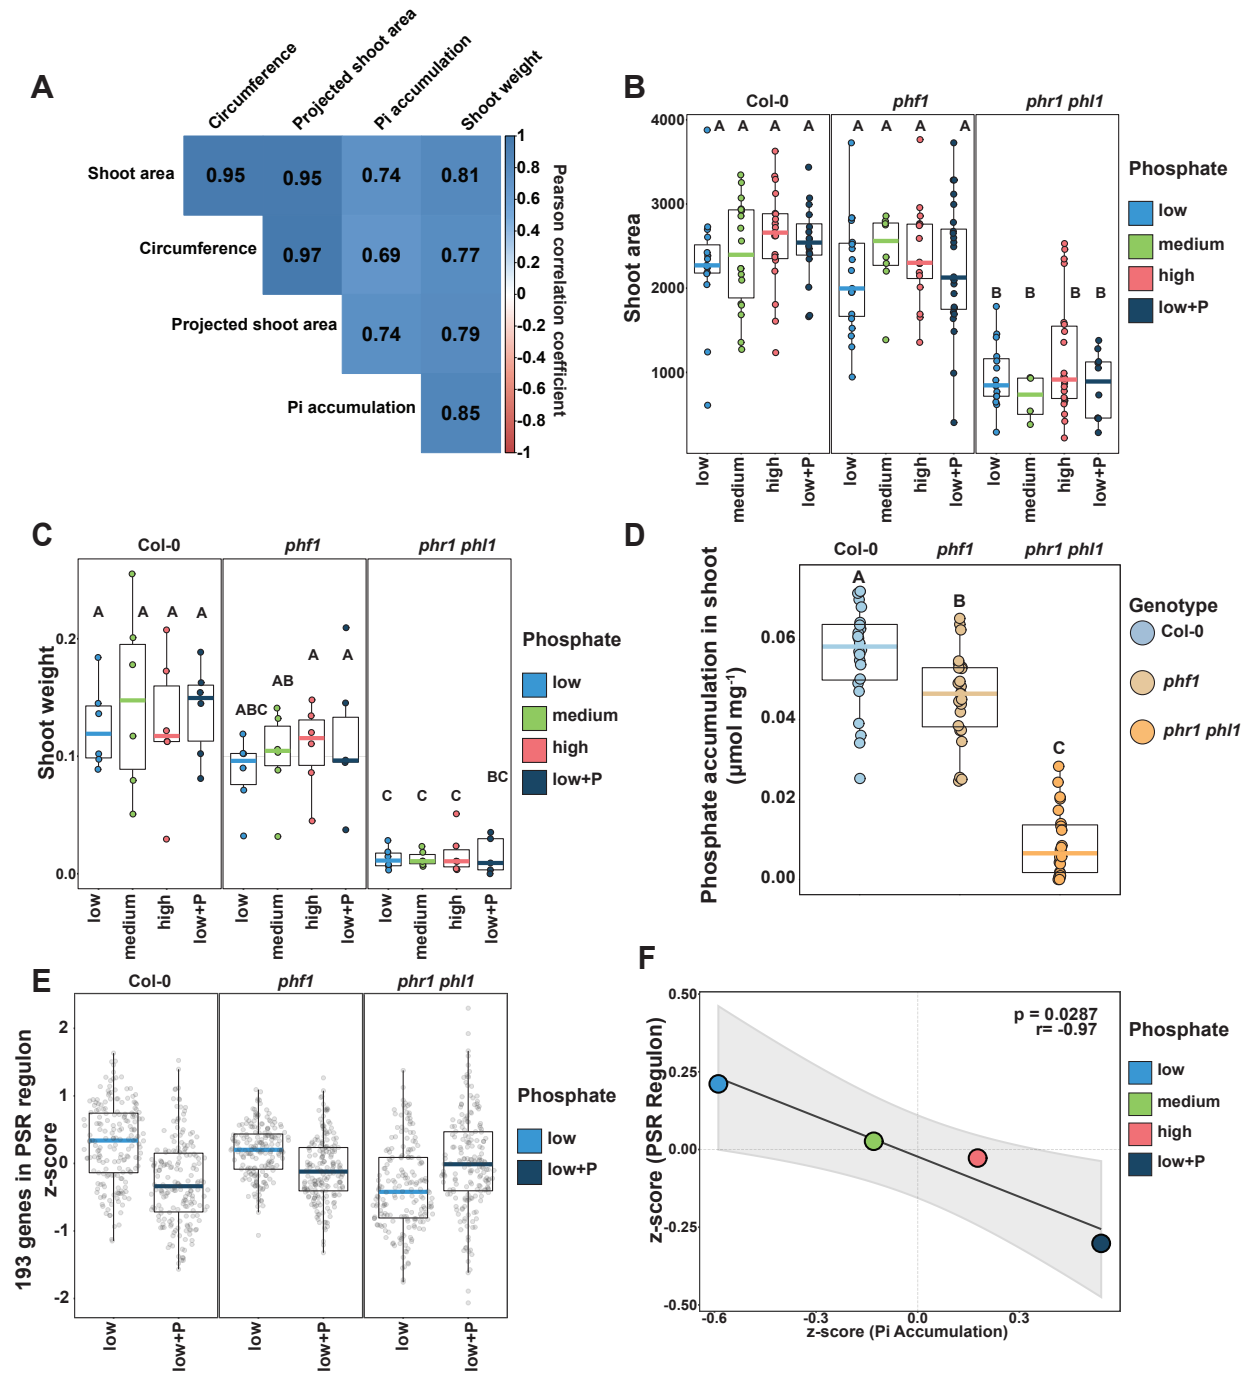

**S1 Figure. Phosphate starvation response in soil. (A)** Heatmap showing the all vs all pairwise Pearson correlation coefficient calculated between the quantified phenotypes associated with the phosphate starvation response: shoot area, shoot fresh weight and shoot free Pi accumulation. **(B)** Boxplot showing the distribution of the shoot area measured across the phosphorus gradient within each of the three genotypes. Letters represent the results of the post hoc test. **(C)** Boxplot showing the distribution of shoot fresh weight measured across the phosphorus gradient within each of the three genotypes. Letters illustrate the results of the post hoc test. **(D)** Boxplot showing the shoot Pi accumulation across the three genotypes. Letters represent the results of the post hoc test. **(E)** Boxplots displaying the average expression of 193 PSR marker genes across the low and low+P samples in each of the three genotypes tested. **(F)** Scatterplot showing the relationship between the standardized average phosphate accumulation in leaves (x-axis) and the average standardized expression of 193 PSR marker genes (y-axis). The p-value and R value were calculated according to Pearson's product moment correlation coefficient.



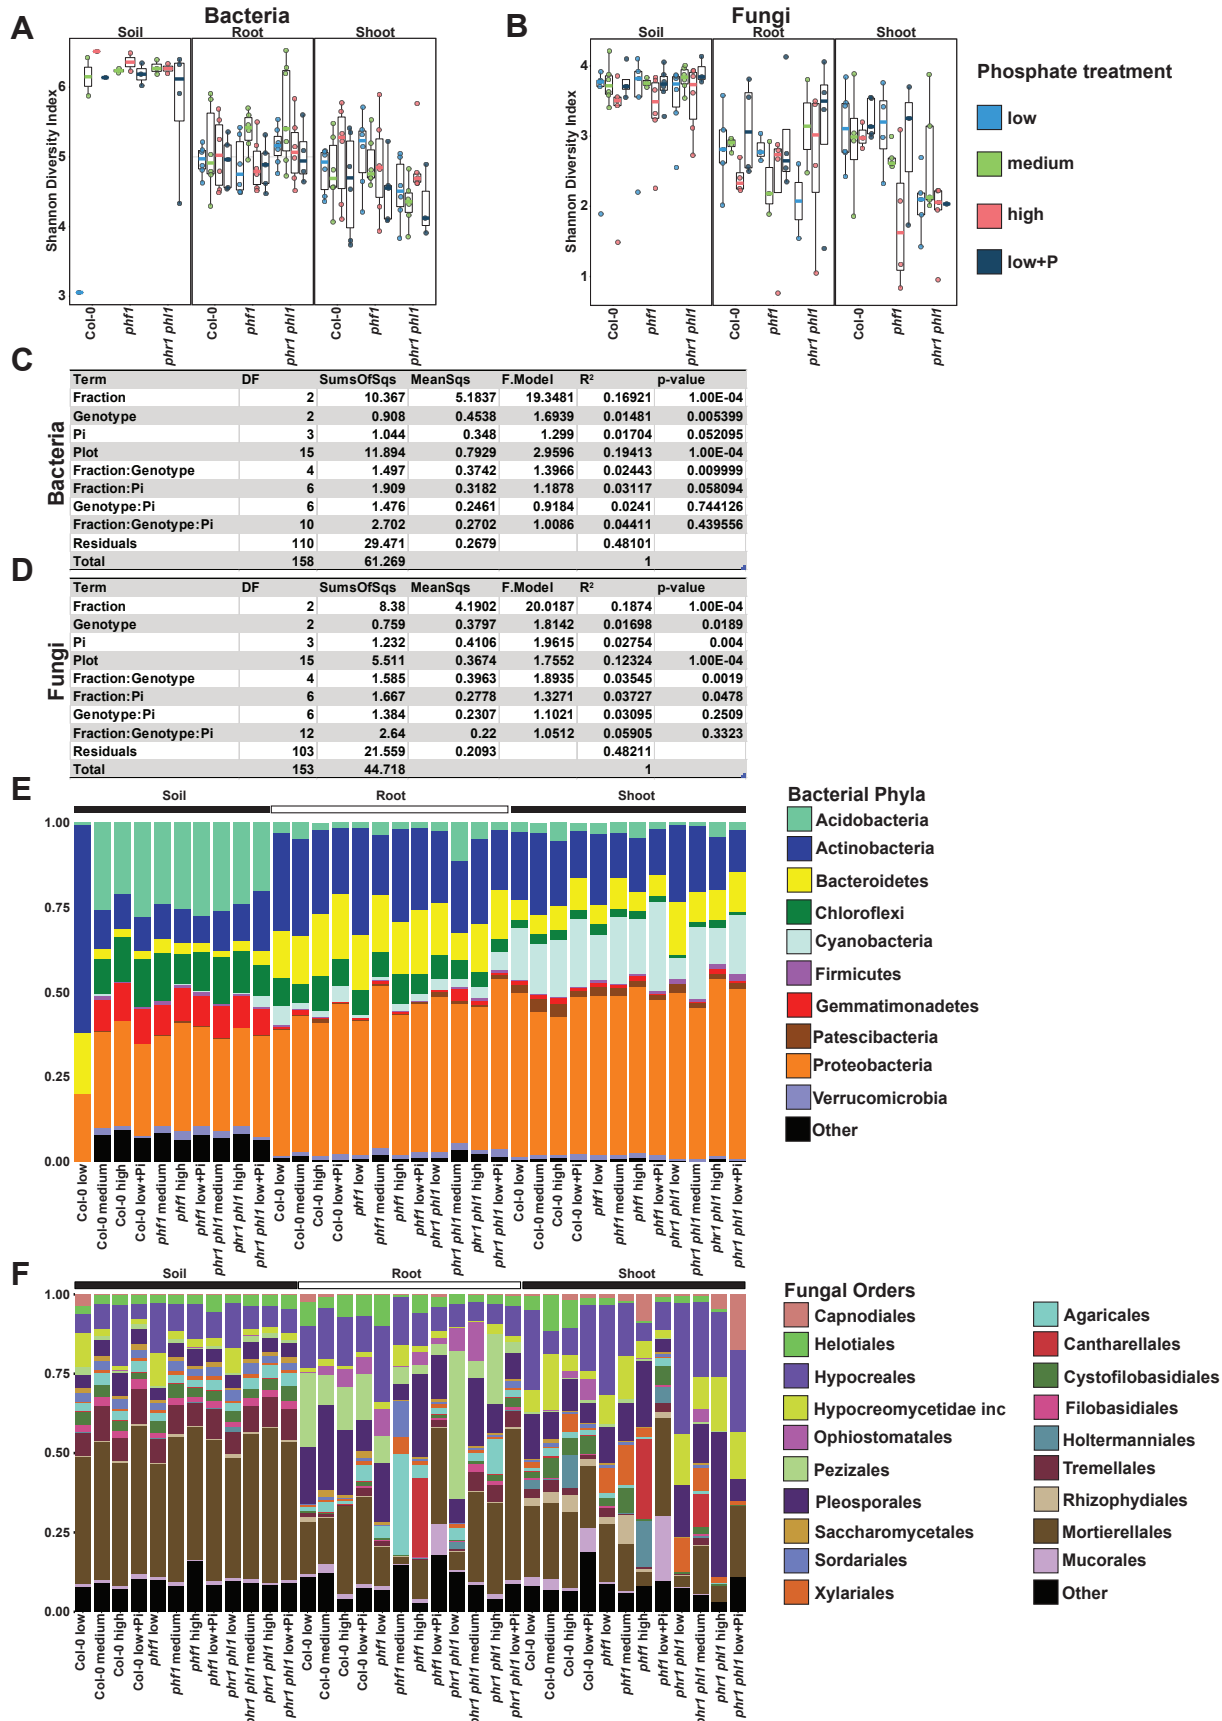

**S2 Figure. Characterization of the soil and plant microbiota in soils exposed to different level of phosphorus fertilization. (A,B)** Boxplots showing the distribution of the alpha diversity (Shannon diversity index) across all levels of phosphorus in the soil for bacteria **(A)** and fungi **(B)**. **(C,D)** PERMANOVA results in which the effect of the three variables (Fraction, Genotype and Soil P) and their interaction on the assembly of the bacterial **(C)** and fungal **(D)** communities were tested. **(E)** Relative abundance profiles of the main bacterial phyla in the three variables (Fraction, Genotype and Soil P) across all levels of P in the soils. **(F)** Relative abundance profiles of the main fungal orders in the three variables (Fraction, Genotype and Soil P) across all the levels of P in the soils.

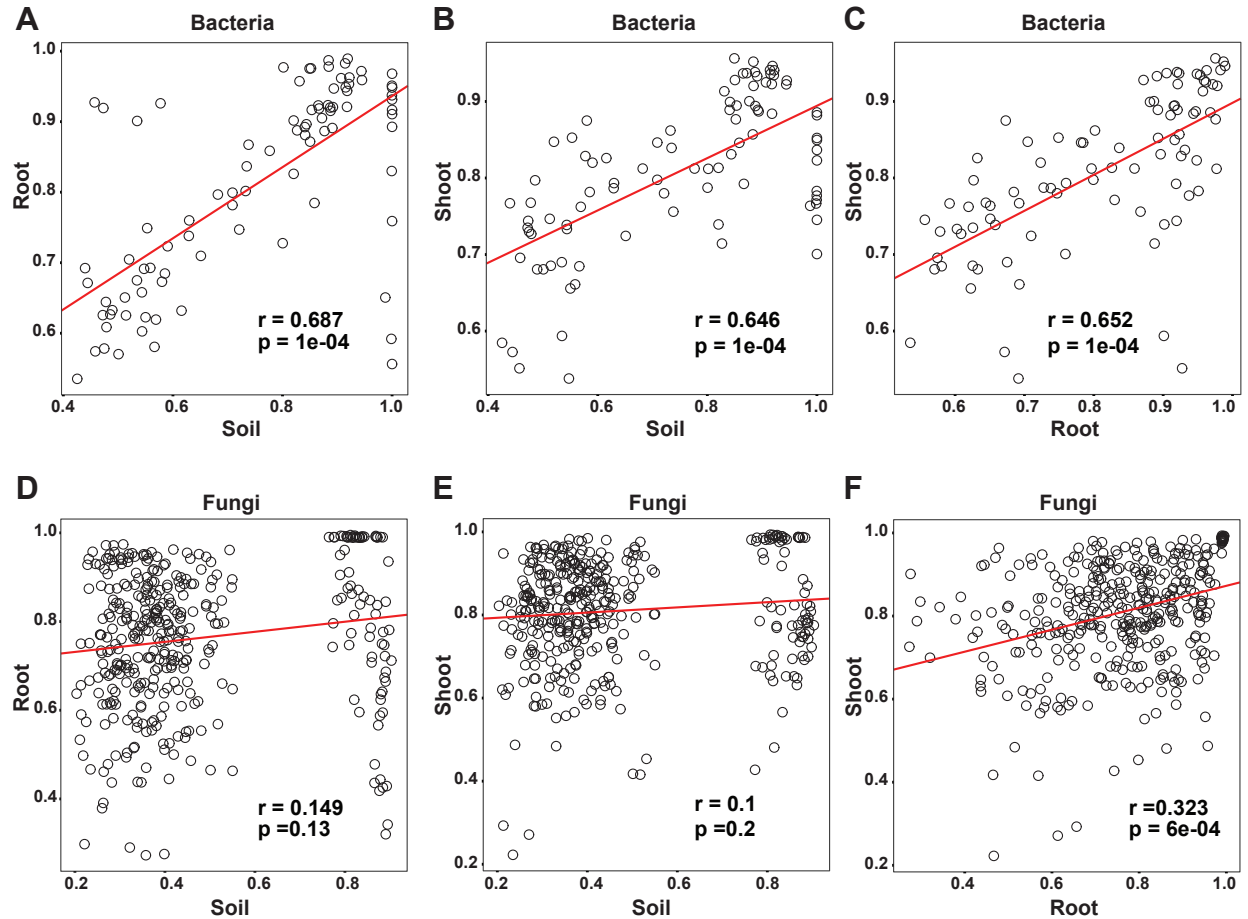

**S3 Figure. Bacterial but not fungal plant microbiota composition is strongly dependent on soil inoculum. (A,B,C)** Correlation plots between Bray-Curtis distance matrices calculated for bacteria within soil treatments, root and shoot fractions. The R and p-values were calculated using Mantel tests. **(A)** Correlation plot of soil vs root. **(B)** Correlation plot of soil vs shoot. **(C)** Correlation plot of root vs shoot. **(D,E,F)** Correlation plots between Bray-Curtis distance matrices calculated for fungi within soil treatments, root and shoot fractions. The R and p-values were calculated using Mantel tests. **(D)** Correlation plot of soil vs root. **(E)** Correlation plot of soil vs shoot. **(F)** Correlation plot of root vs shoot.

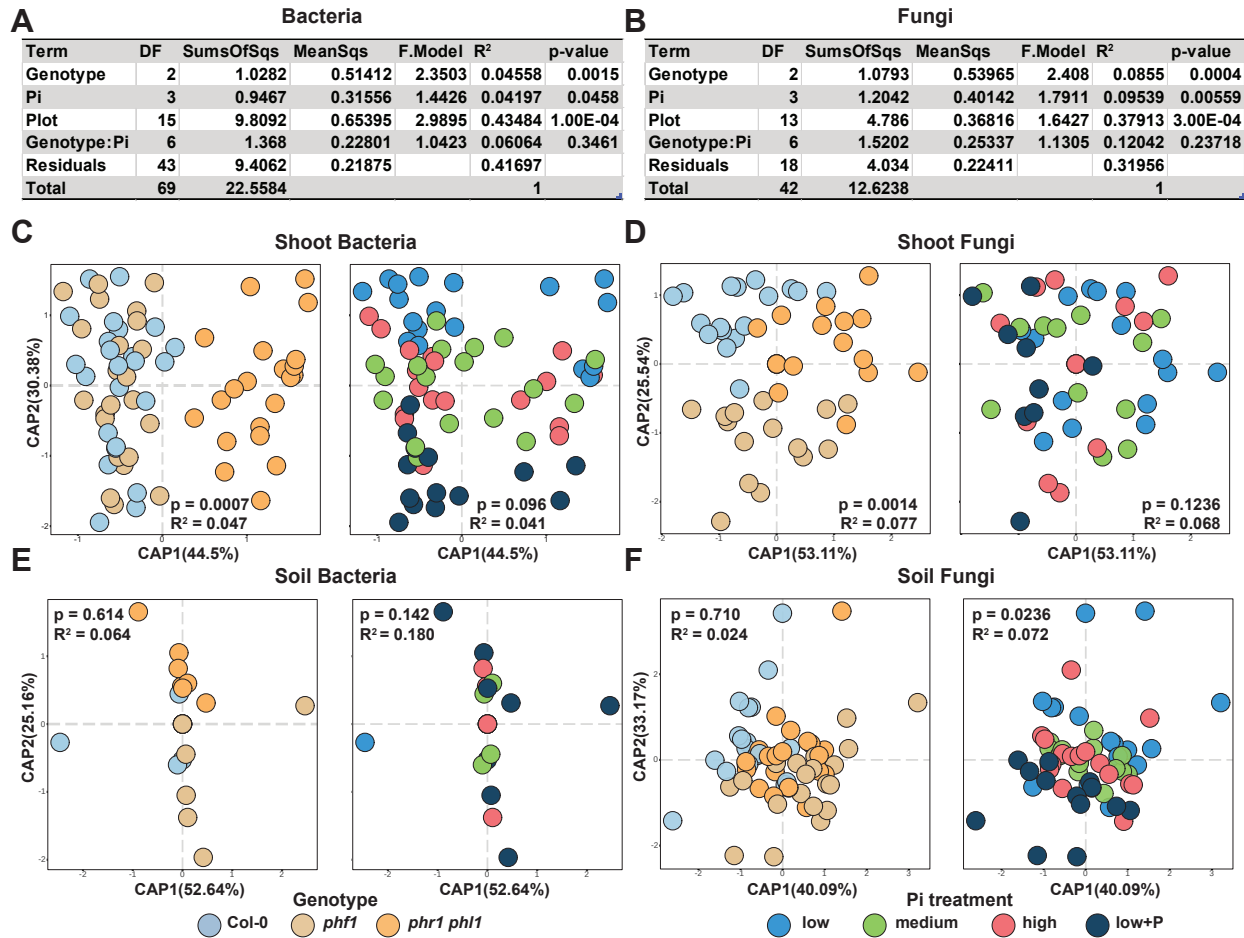

**S4 Figure. Plant genotypes and soil phosphorus concentrations influence the composition of the plant microbiota. (A,B)** PERMANOVA results showing the influence of the plant genotype and soil P concentration and their interaction on the assembly of the root **(A)** bacterial and **(B)** fungal communities. **(C,D)** Canonical analysis of principal coordinates showing the effect of plant genotype and P content in the soil over the shoot **(C)** bacterial and **(D)** fungal communities (Materials and methods 4b). The p-value and R<sup>2</sup> values in each plot are derived from a PERMANOVA model and correspond to the genotype and soil P term respectively. **(E,F)** Canonical analysis of principal coordinates showing the influence of genotype and P on the soil **(E)** bacterial and **(F)** fungal communities (Materials and methods 4b). The p-value and R<sup>2</sup> values in each plot are derived from a PERMANOVA model and correspond to the genotype and soil P term respectively.

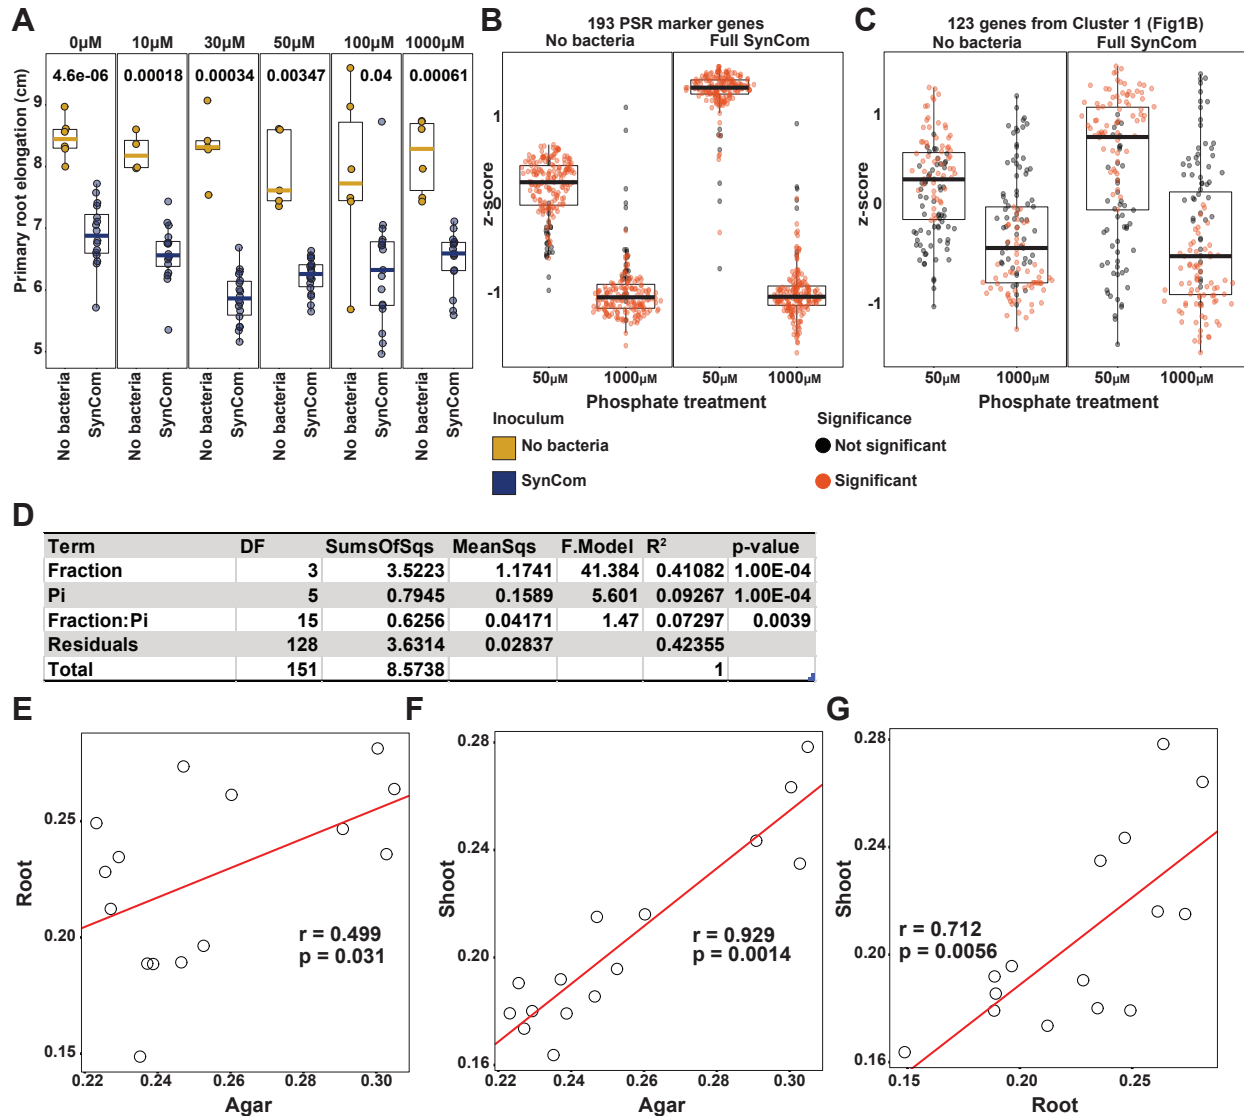

**S5 Fig. A bacterial synthetic community modifies the plant phosphate starvation response.**

(A) Boxplots displaying the primary root elongation of plants grown in a gradient of Pi concentrations in sterile conditions or with the SynCom (Materials and methods 2g). A t-test was used for each Pi treatment to estimate differences between SynCom-treated and uninoculated plants. (B) Average expression of the 193 PSR marker genes in low (50  $\mu$ M) and high (1000  $\mu$ M) Pi conditions within Syncom-treated and uninoculated plants. (Materials and methods 4g). (C) Average expression of the 123 genes from Cluster 1 (Figure 1B) in low (50  $\mu$ M) and high (1000  $\mu$ M) Pi conditions within Syncom-treated and uninoculated plants. (D) PERMANOVA model results showing the influence of the two variables (Fraction and Pi concentration) and their interaction on the assembly of the bacterial community in the plant. (E,F,G) Correlation plots between Bray-Curtis distance matrices calculated for bacterial profile within agar, root and shoot fractions. The R and p-values were calculated using mantel tests. (E) Correlation plot of agar vs root. (F) Correlation plot of agar vs shoot. (G) Correlation plot of root vs shoot.

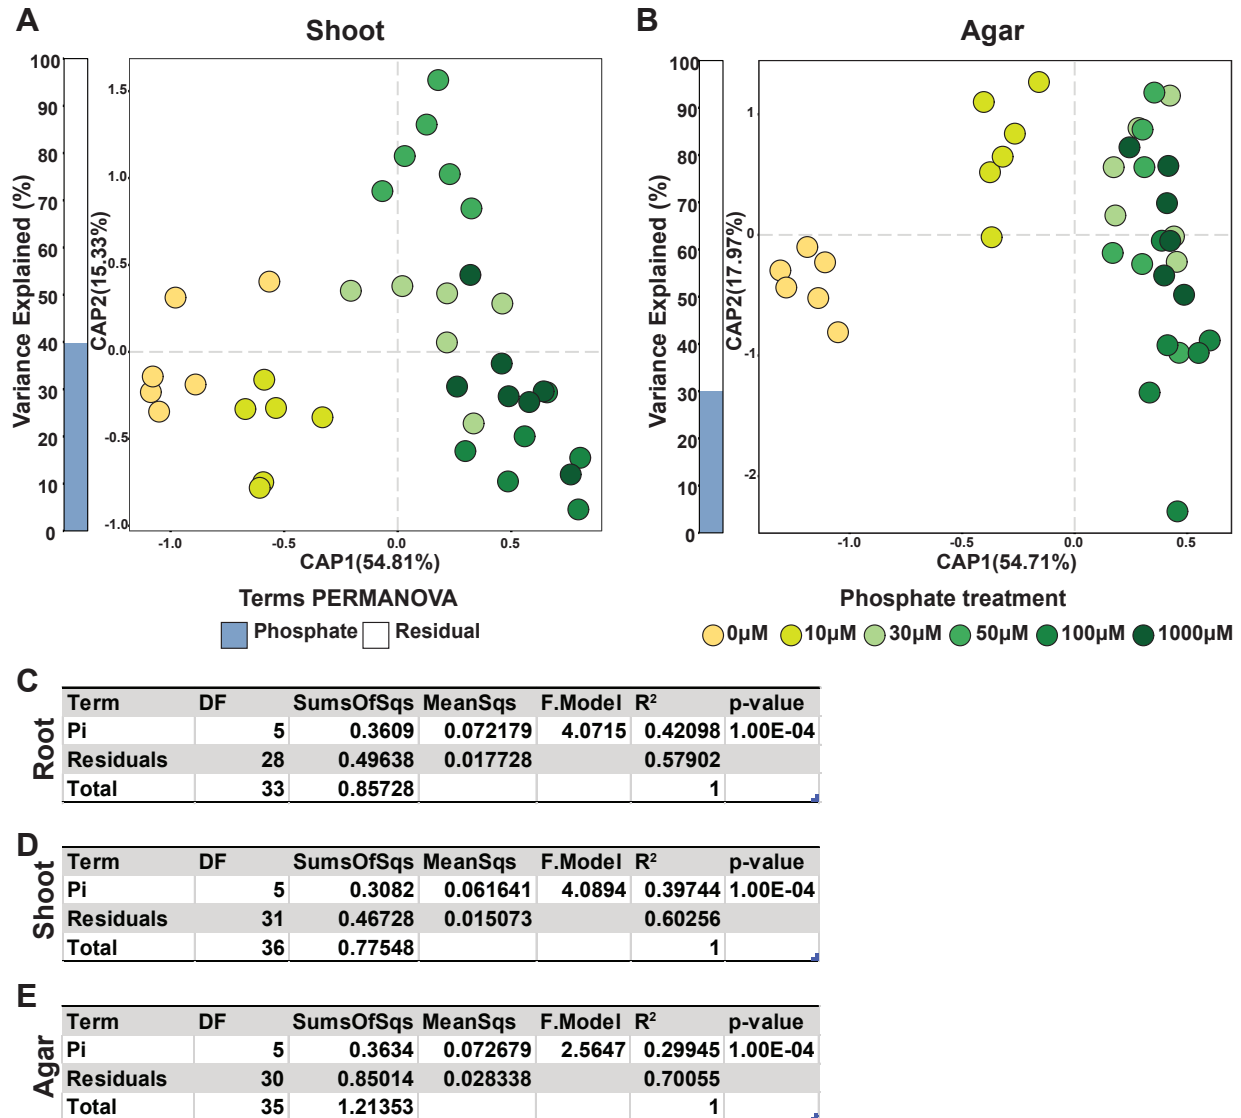

**S6 Figure. Bacterial synthetic community responds to the phosphate concentration in the media.**

(A,B) Canonical analysis of principal coordinates showing the influence of Pi concentration in the media on the bacterial communities in the (A) plant shoot and (B) agar. The bar graphs to the left of each plot depict the percentage of variability explained by statistically significant ( $p$ -value < 0.05) variables based on a PERMANOVA model (Materials and methods 4d). (C,D,E) PERMANOVA model results showing the influence of Pi concentration on the assembly of the bacterial community in (C) roots, (D) shoot and (E) agar.

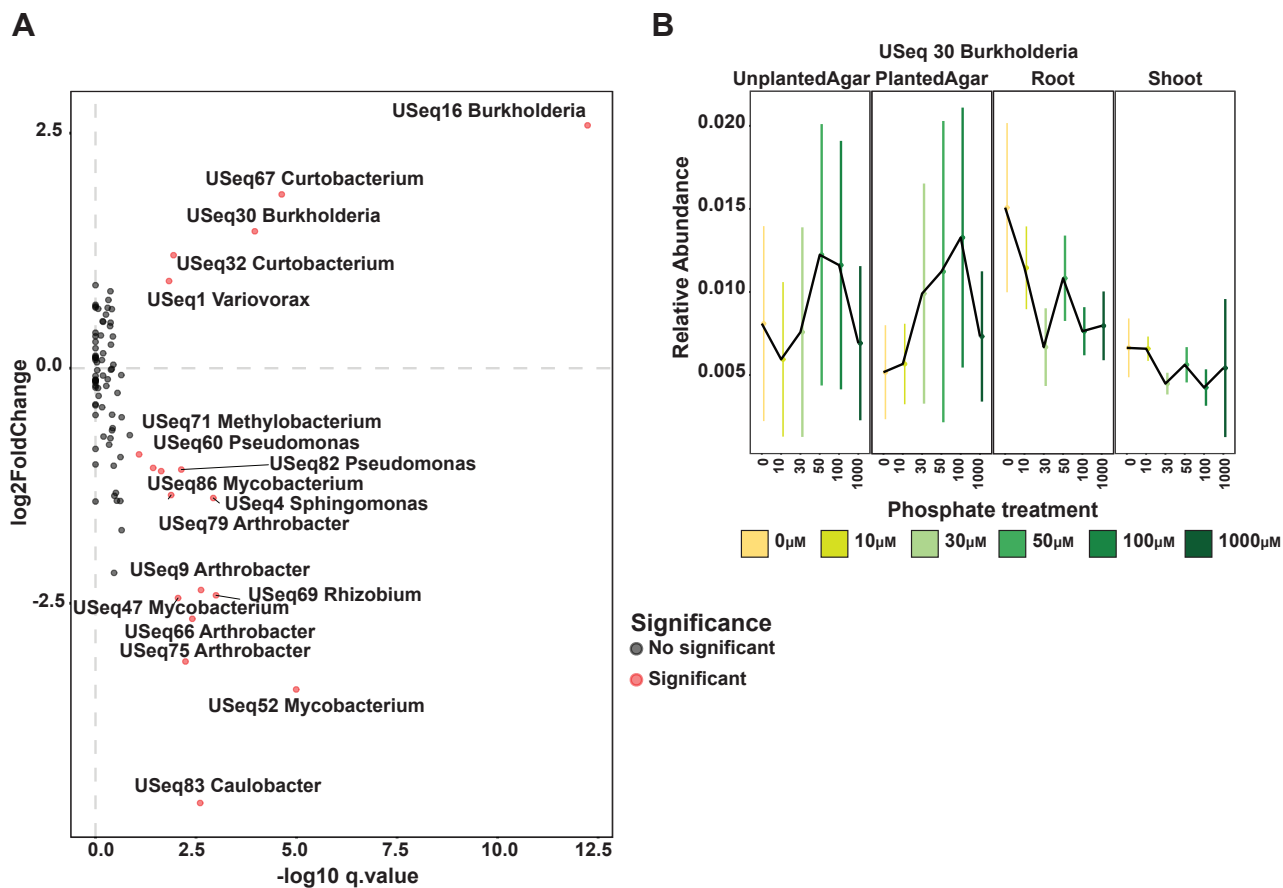

**S7 Figure. USeqs in the bacterial synthetic community displayed a strong Pi: fraction (shoot, root, agar) interaction. (A)** Scatter plot (volcano plot) showing the results of the GLM interaction model between fraction and Pi concentration. The axes of the plot represent the output of the statistical test. The x-axis is the transformed q-value and the y-axis the log2 fold change. Each dot in the scatterplot represents a USeq. USeqs that showed a statistically significant fraction:Pi interaction are colored in red. USeqs genus and ID are displayed. The top right quadrant represents USeqs that are enriched in the plant tissues under low Pi conditions. **(B)** Relative abundance of Burkholderia USeq 30 that exhibits a statistically significant ( $q\text{-value} < 0.1$ ) Pi-enrichment between the plant fractions and the agar fraction (Materials and methods 4d). The middle dot of each strip bar corresponds to the mean of that particular condition, the range of the strip bar corresponds to the 95% confidence interval of the mean.
